# Supplementary figures and images for: A rapid and modified approach for C-7 amination and amidation of 4-methyl-7-nonafluorobutylsulfonyloxy coumarins under microwave irradiation
Source: Royal Society of Chemistry journal article supplement (doi:10.1039/c4ra01720j), 2014-01-01

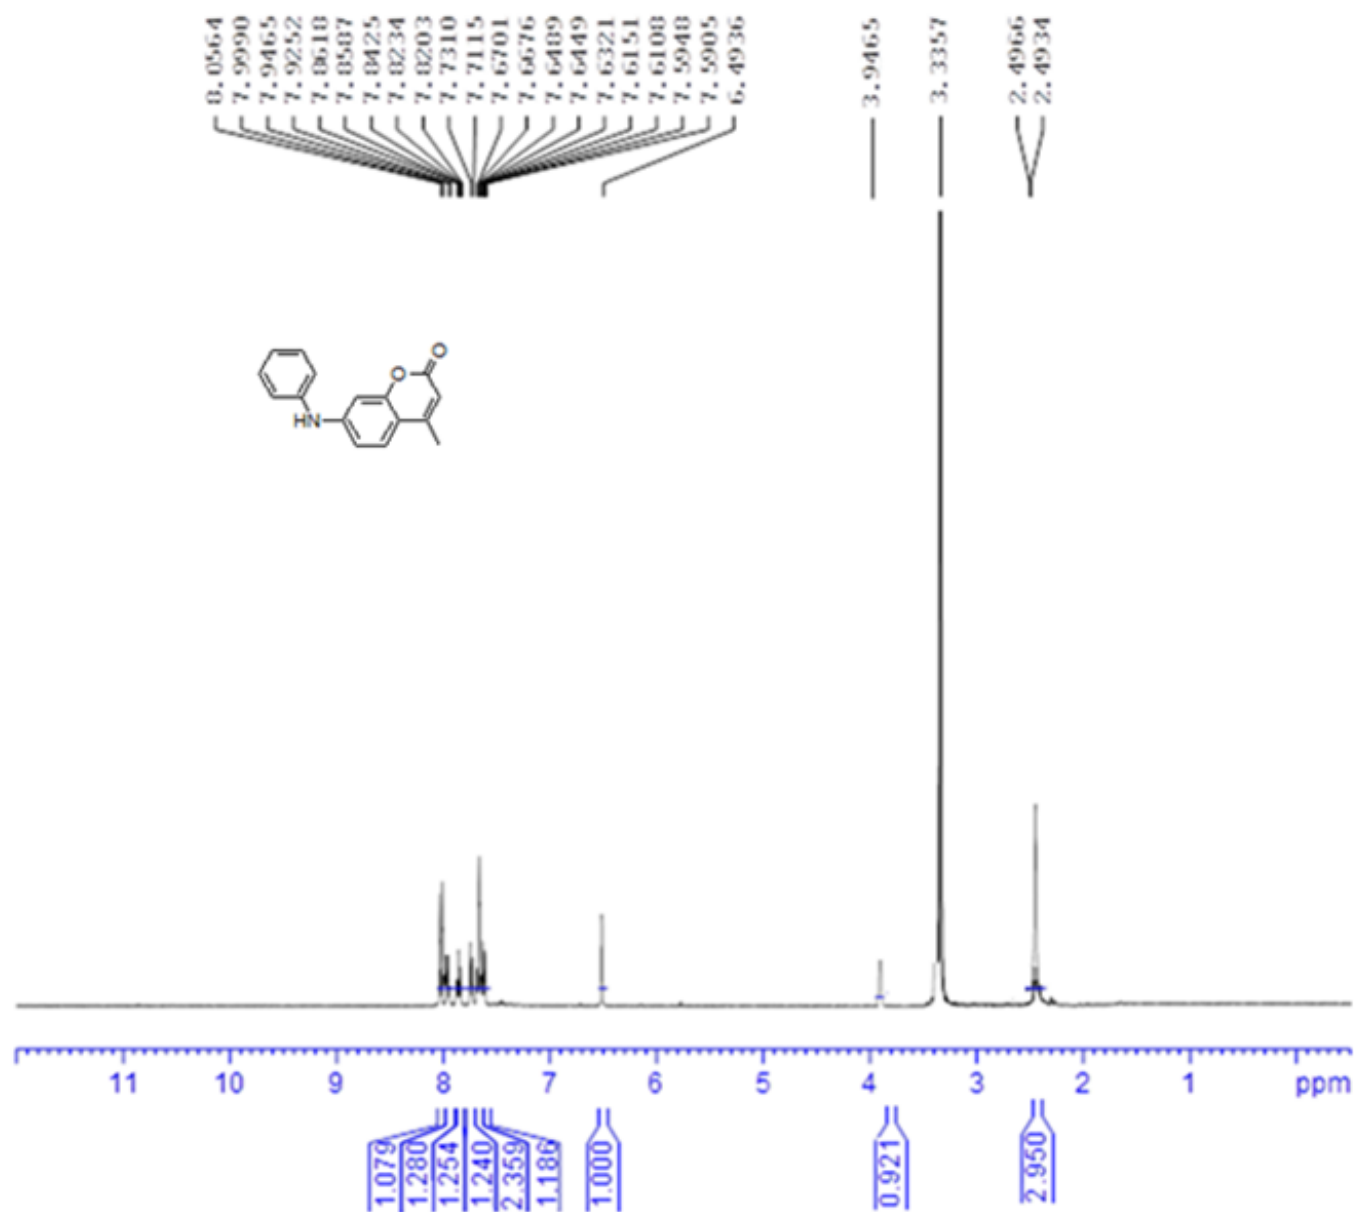

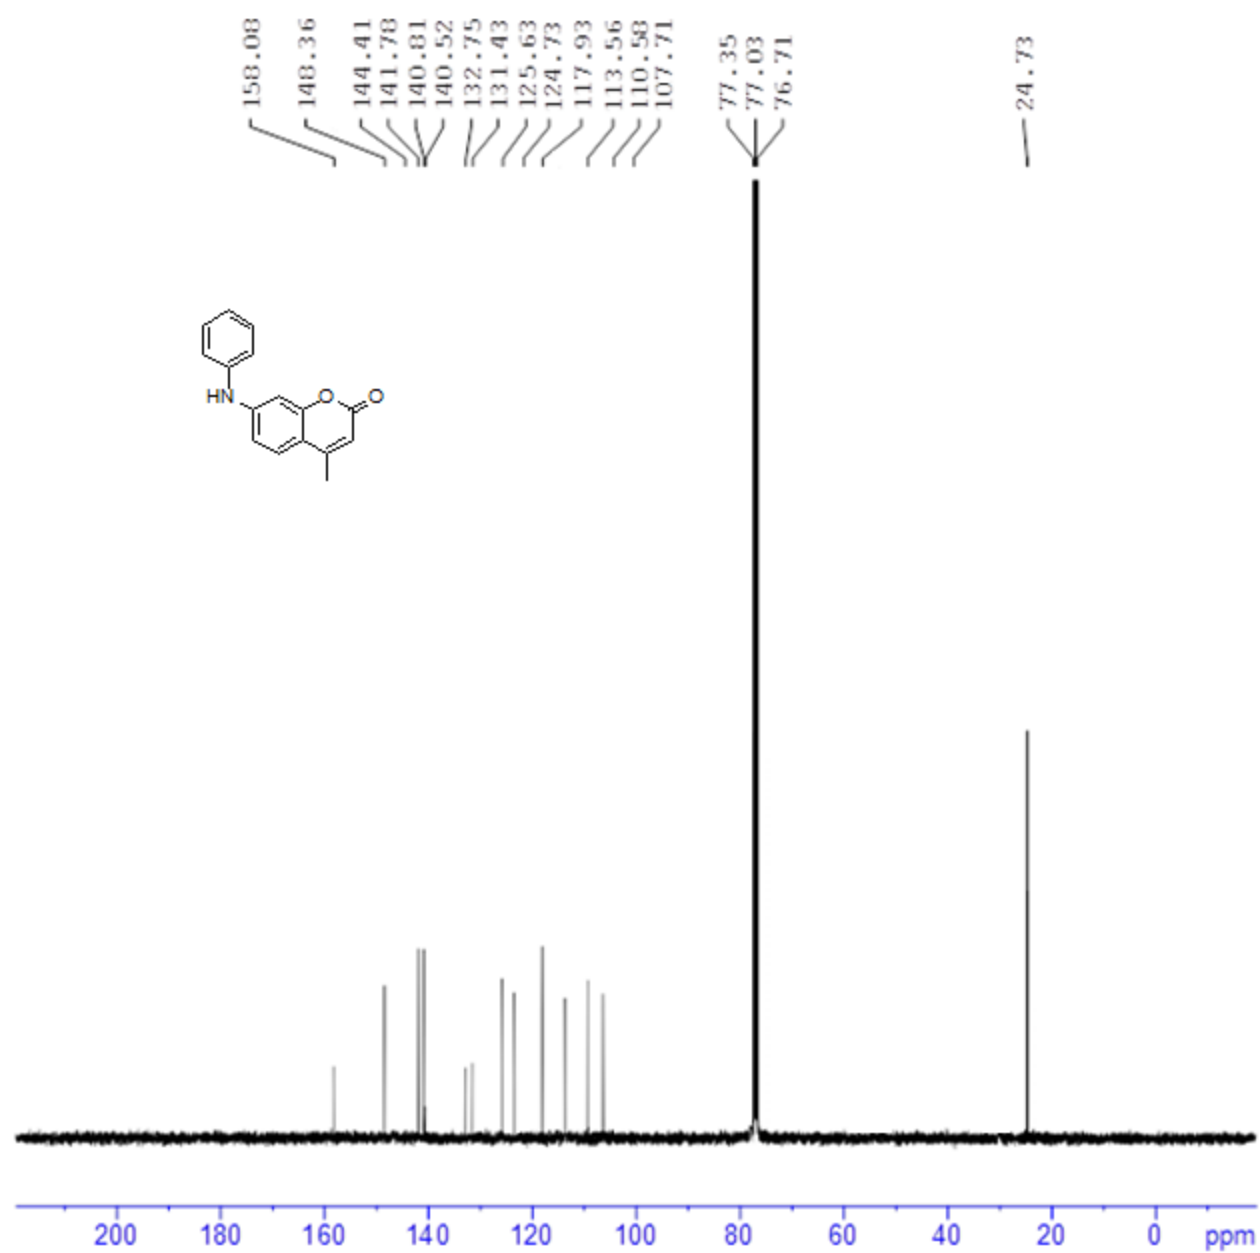

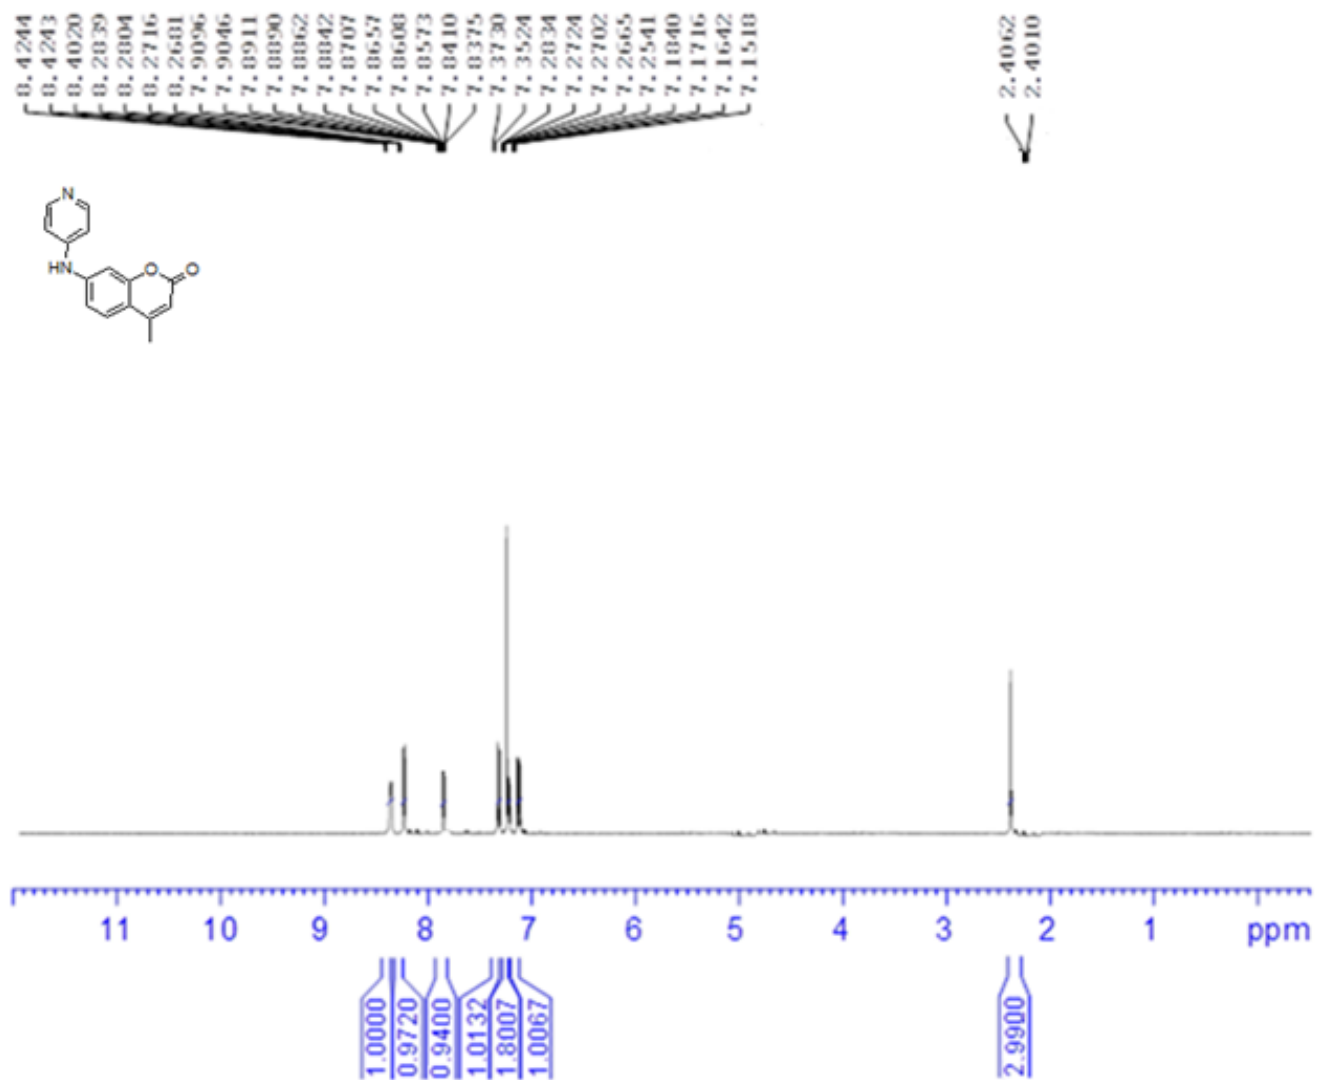

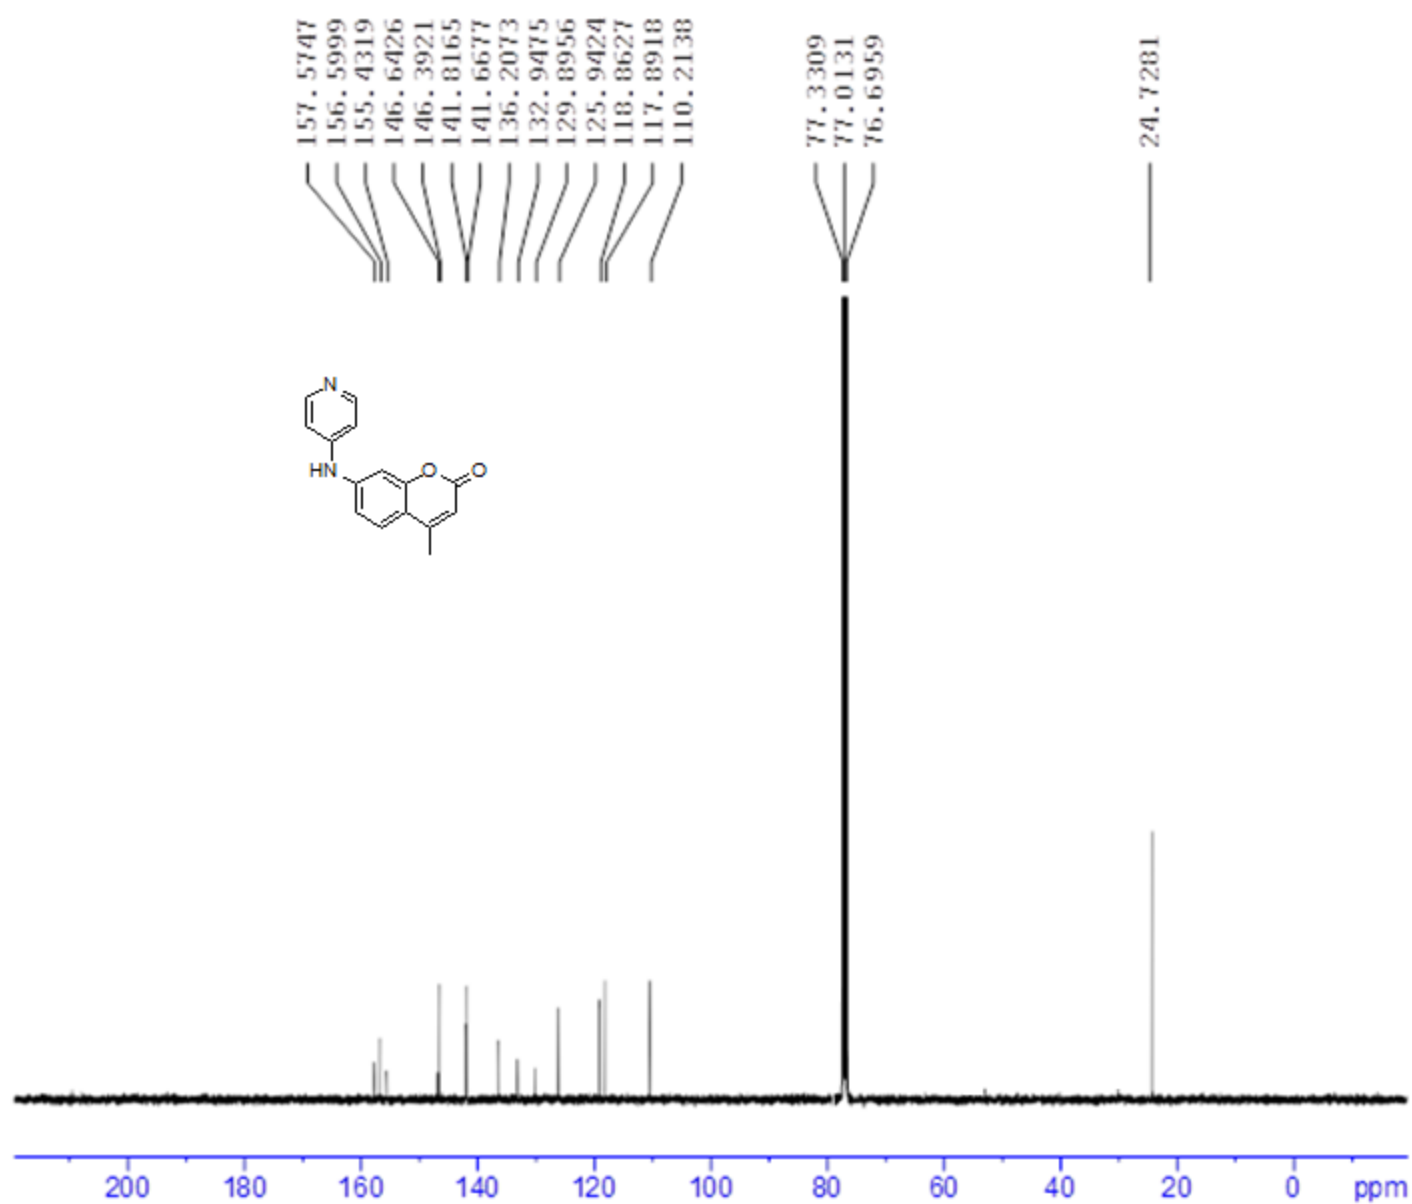

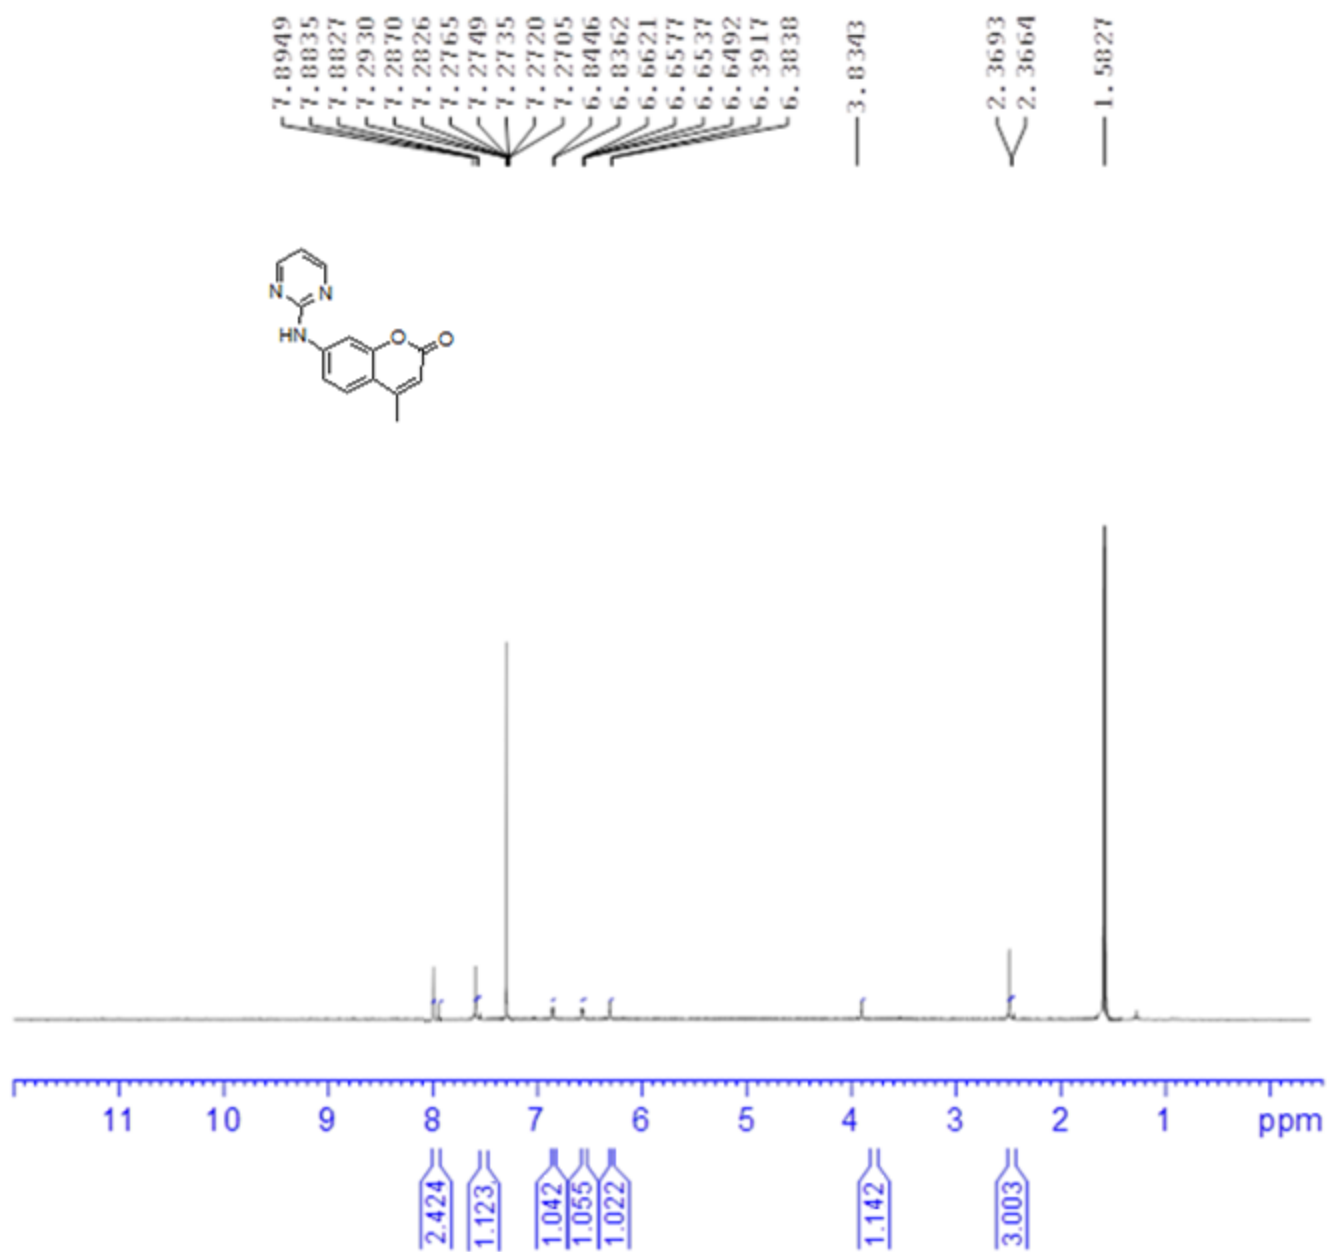

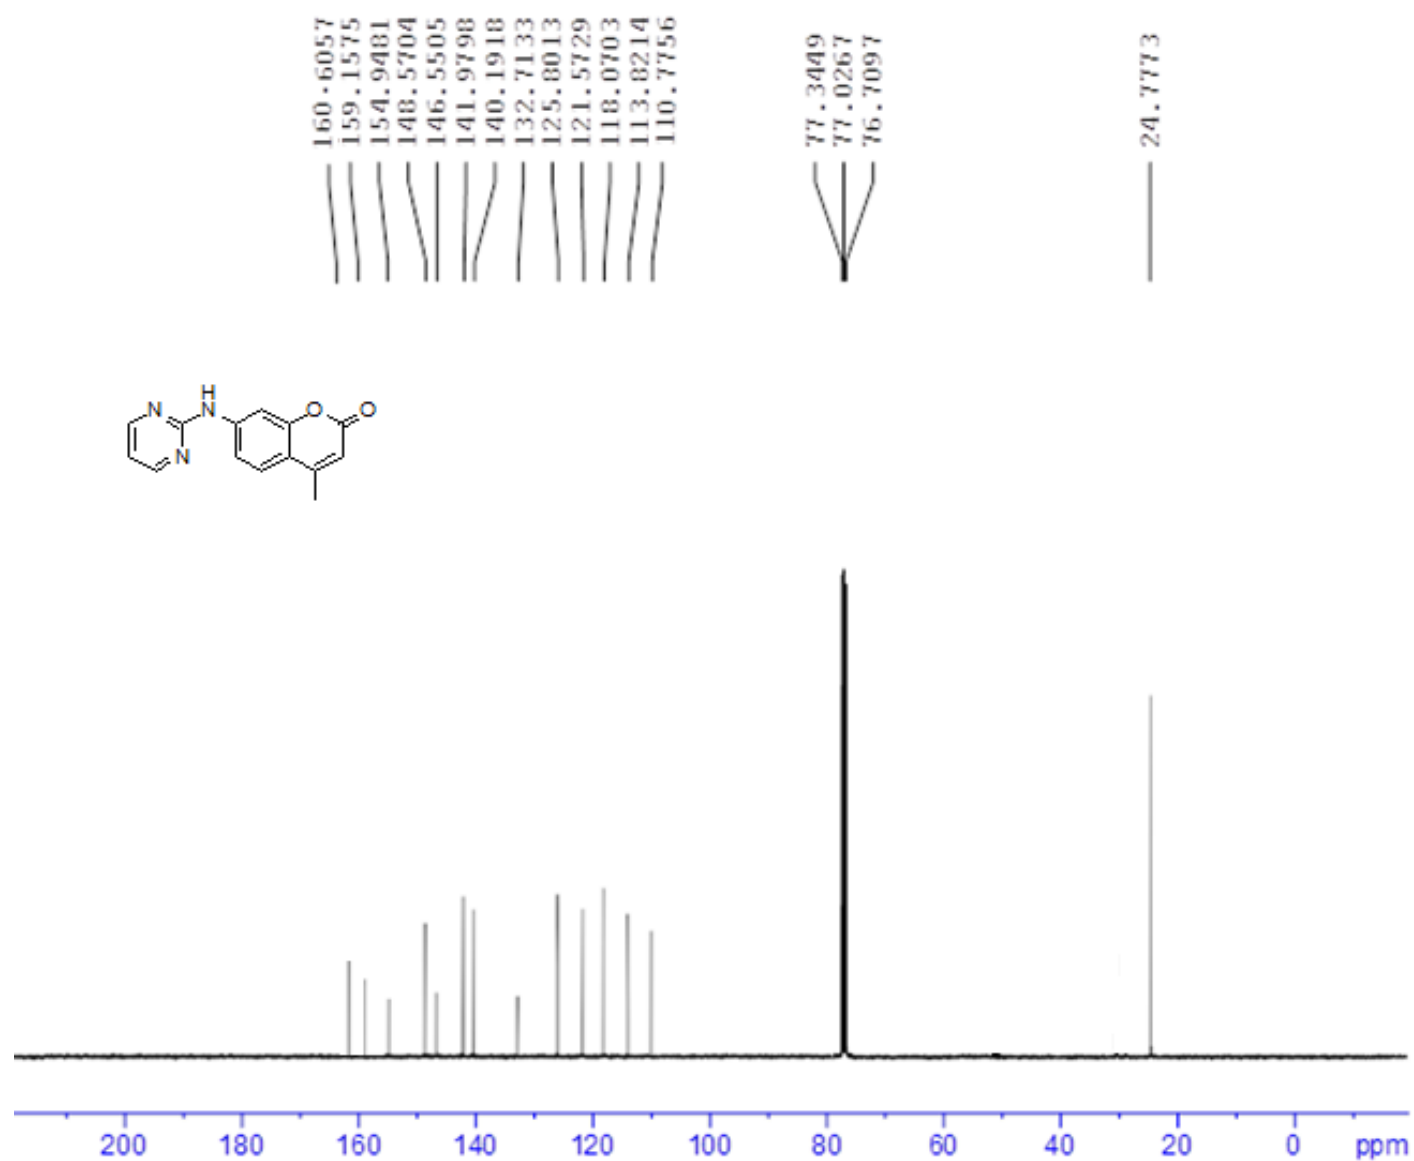

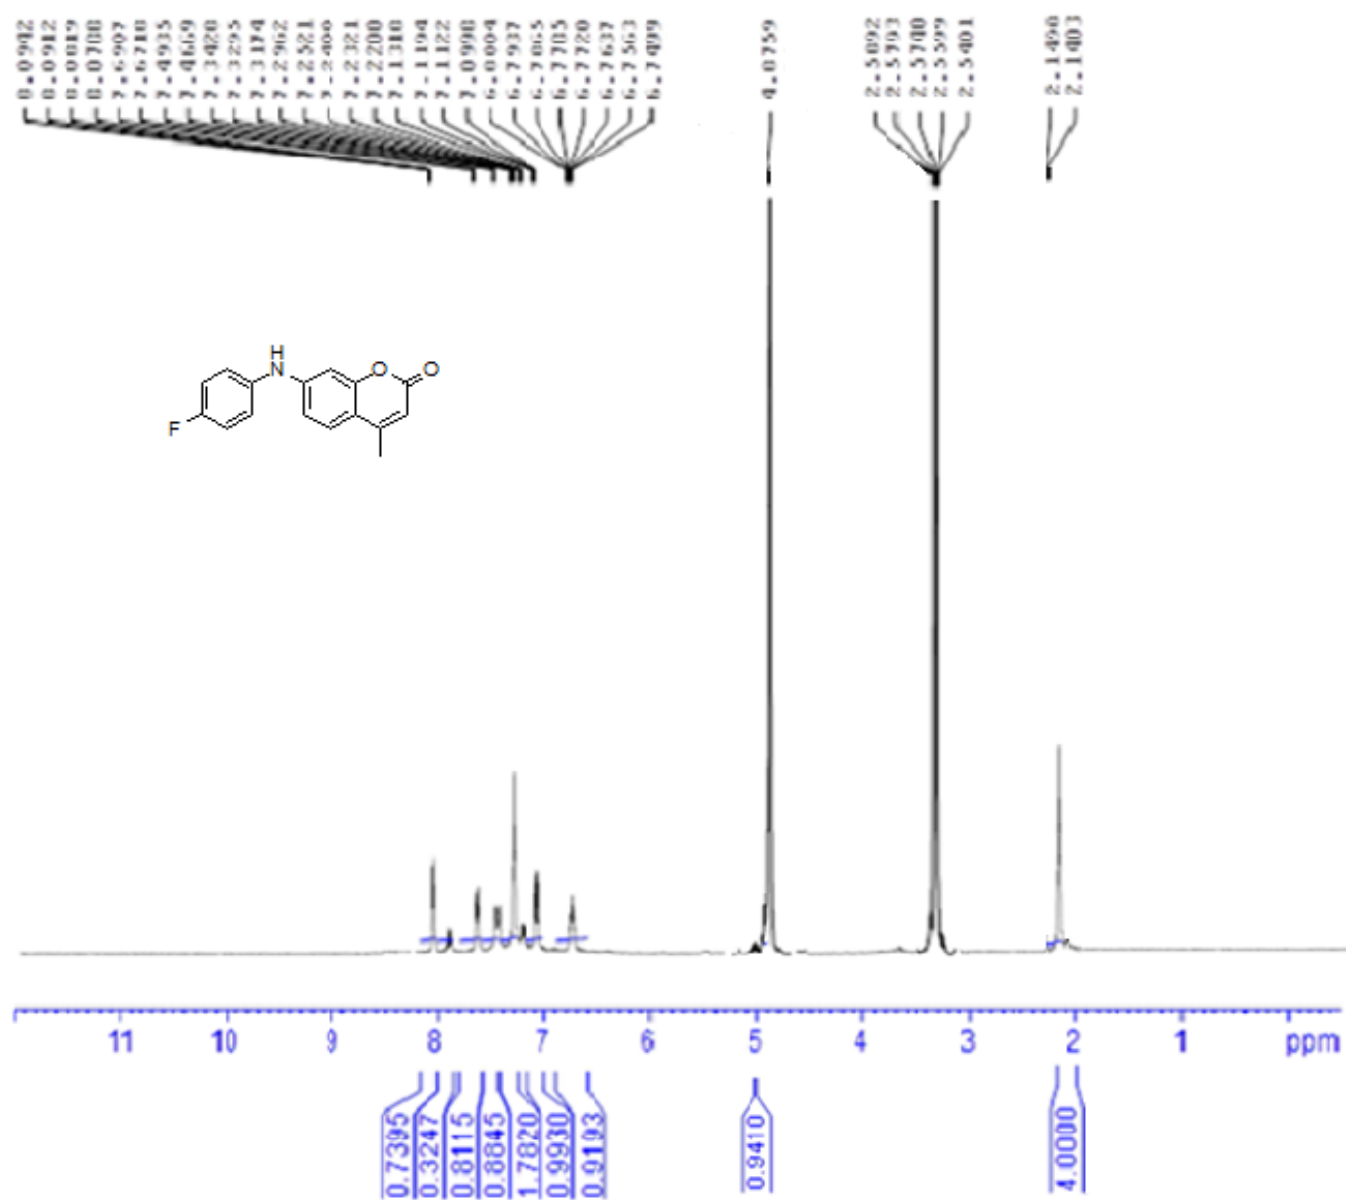

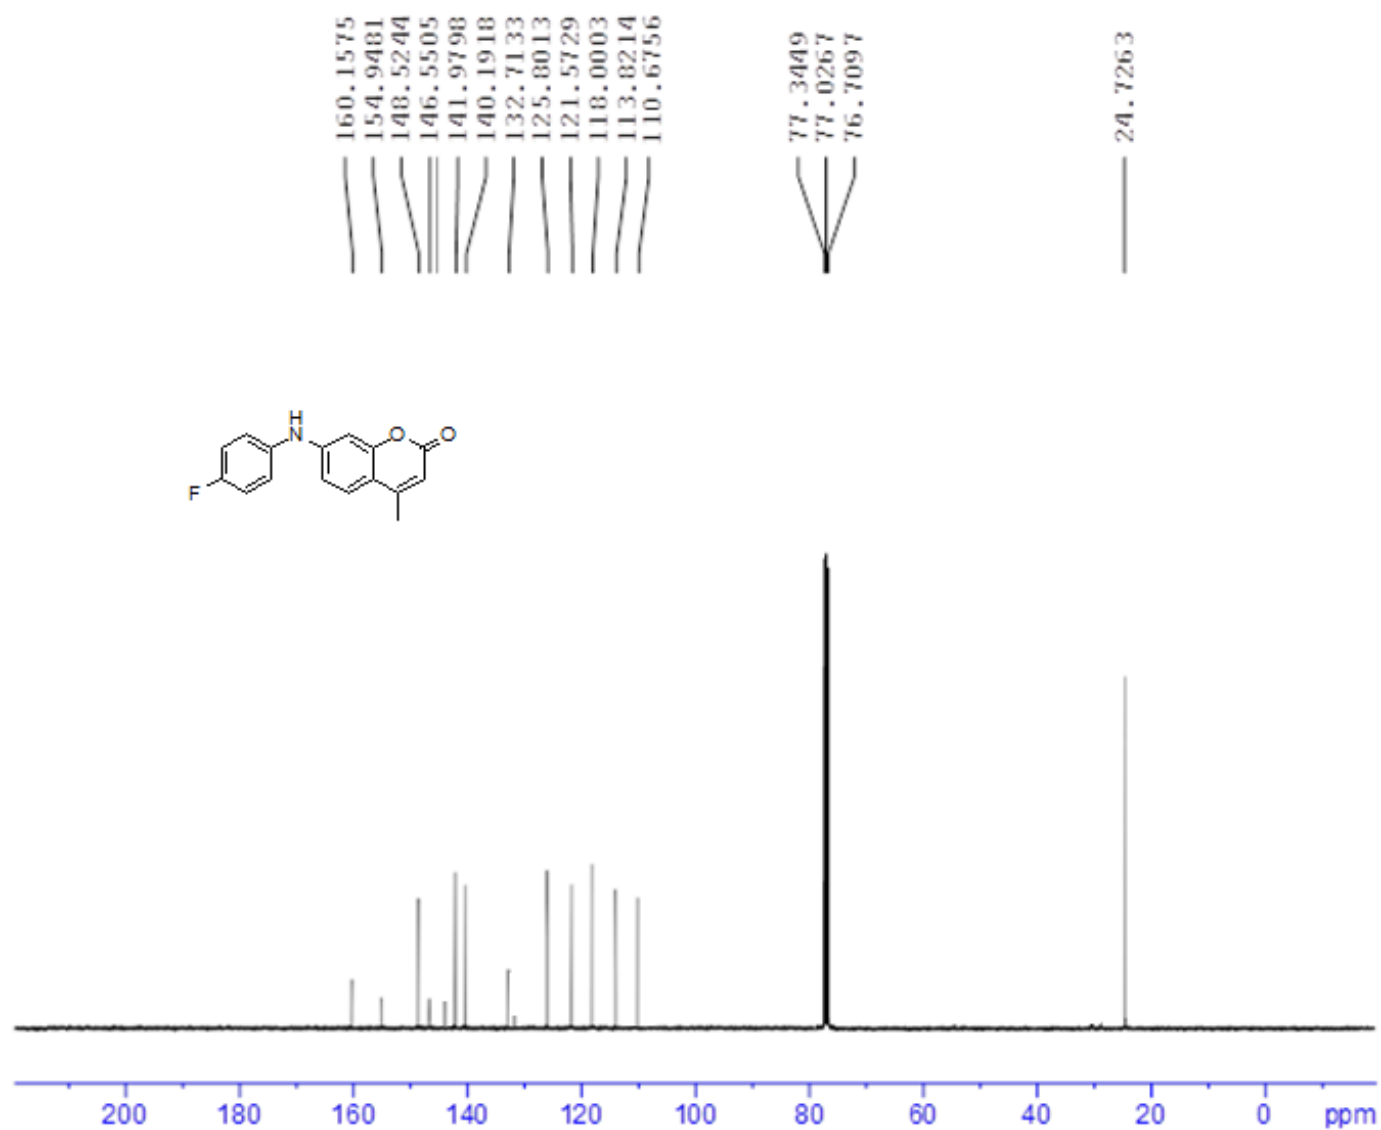



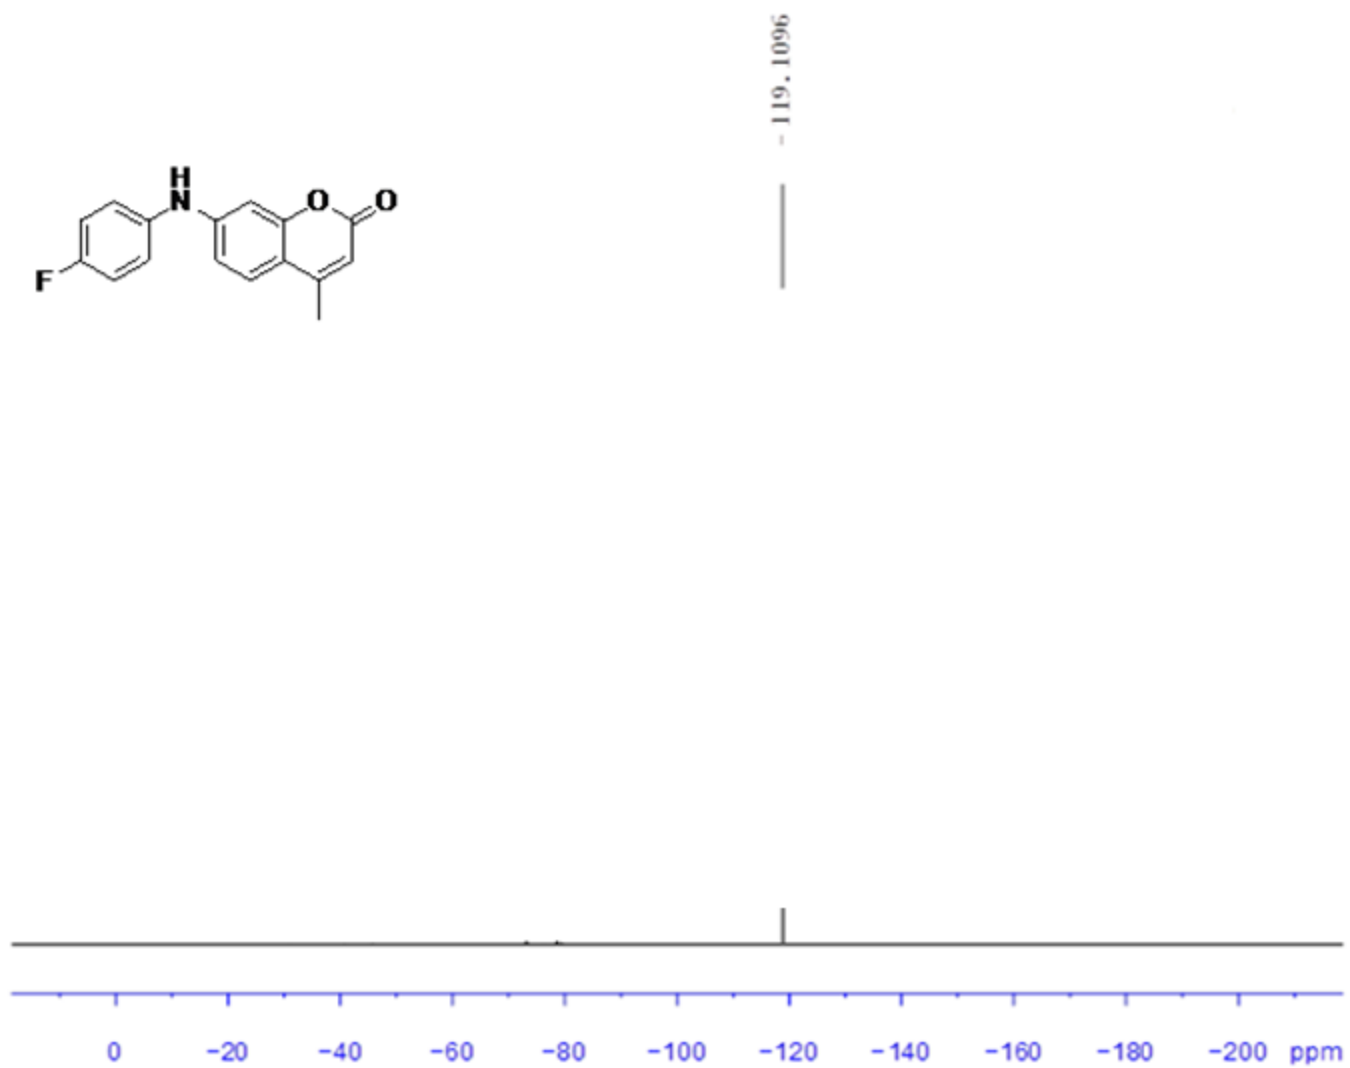

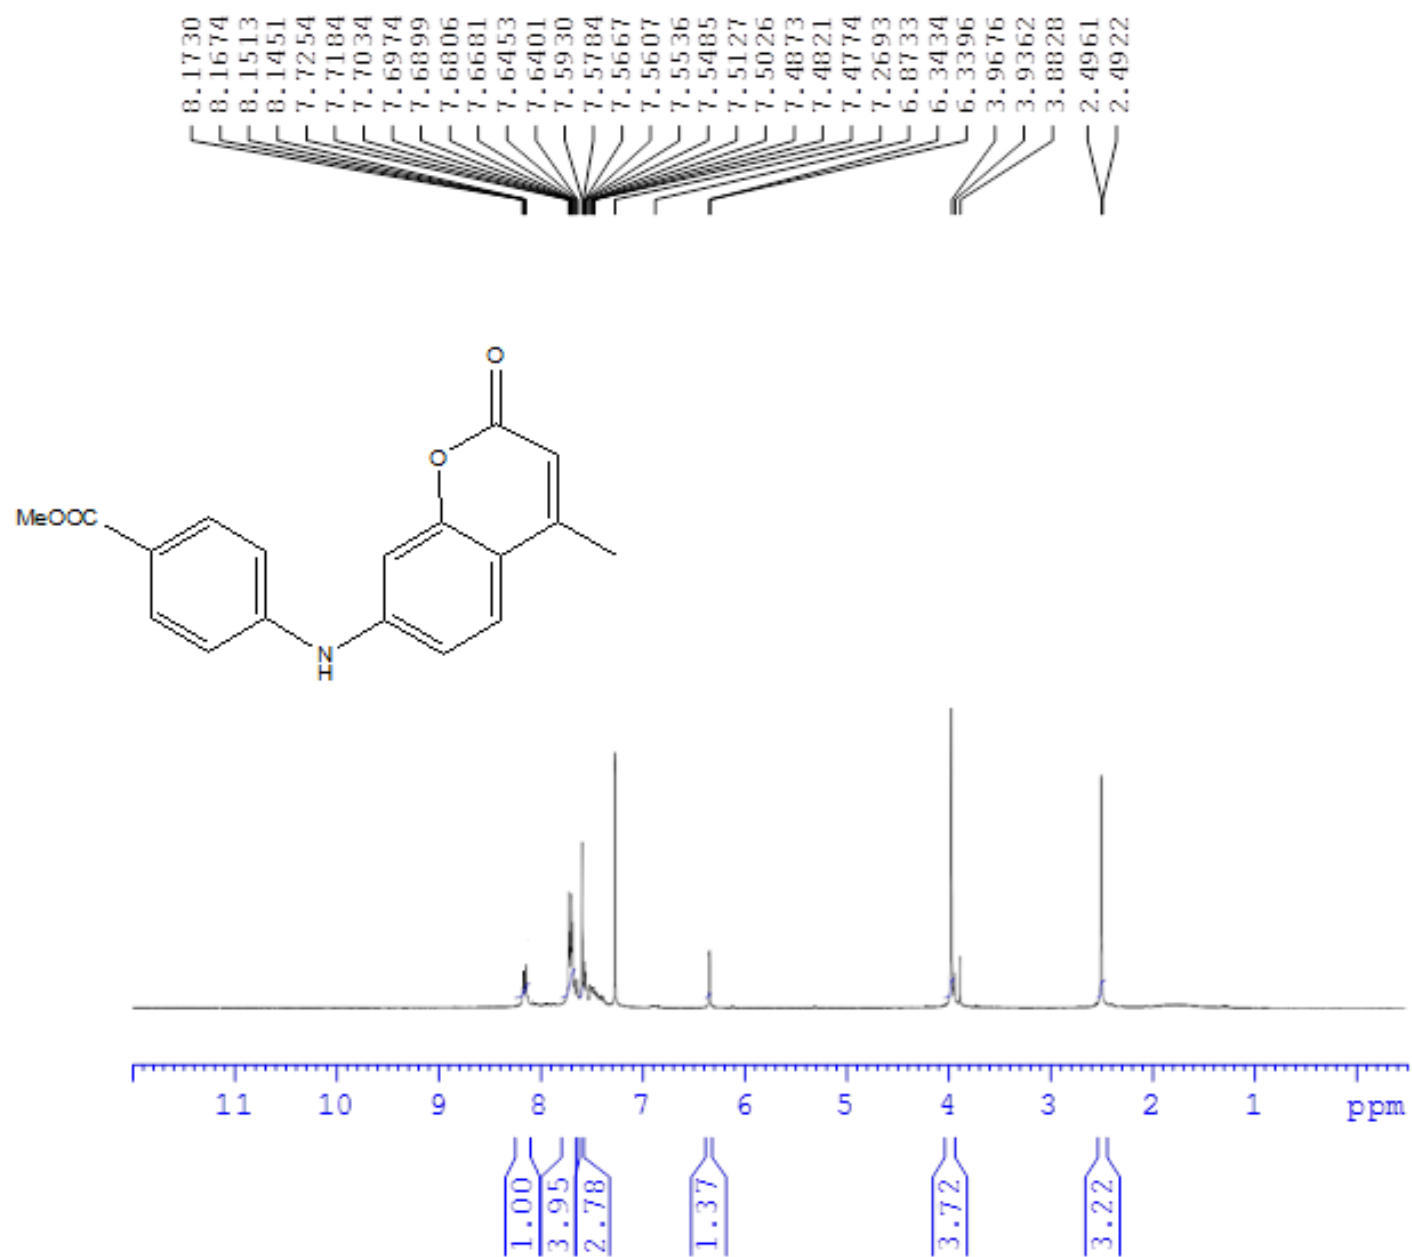

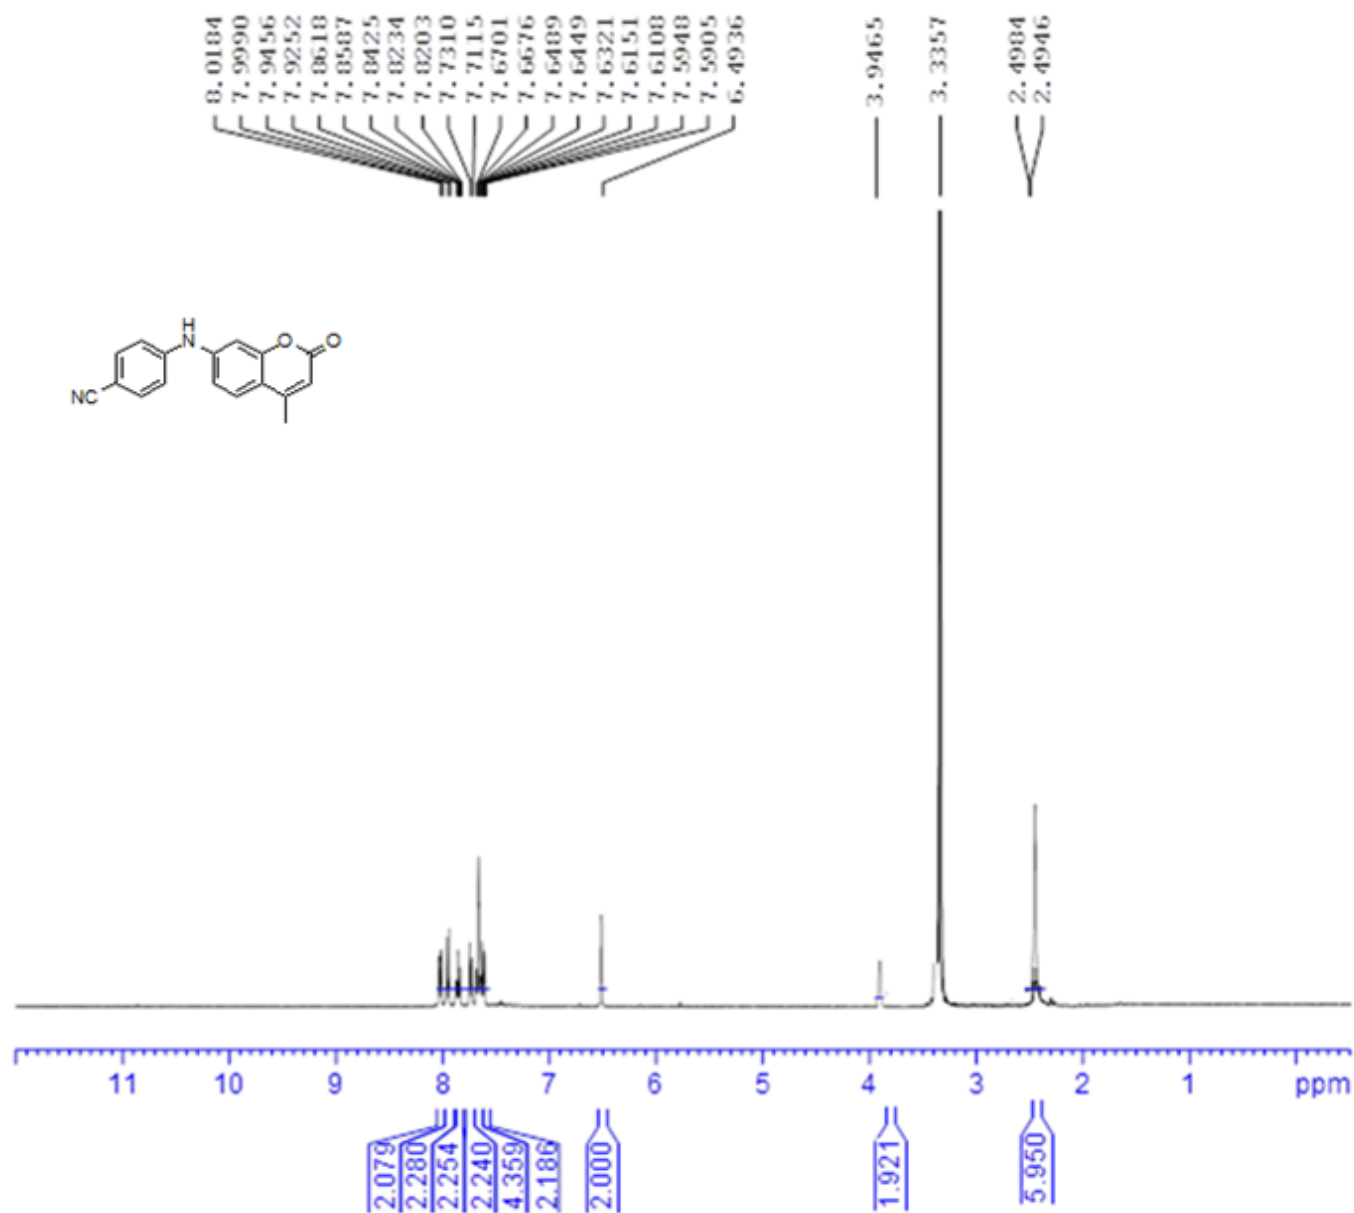

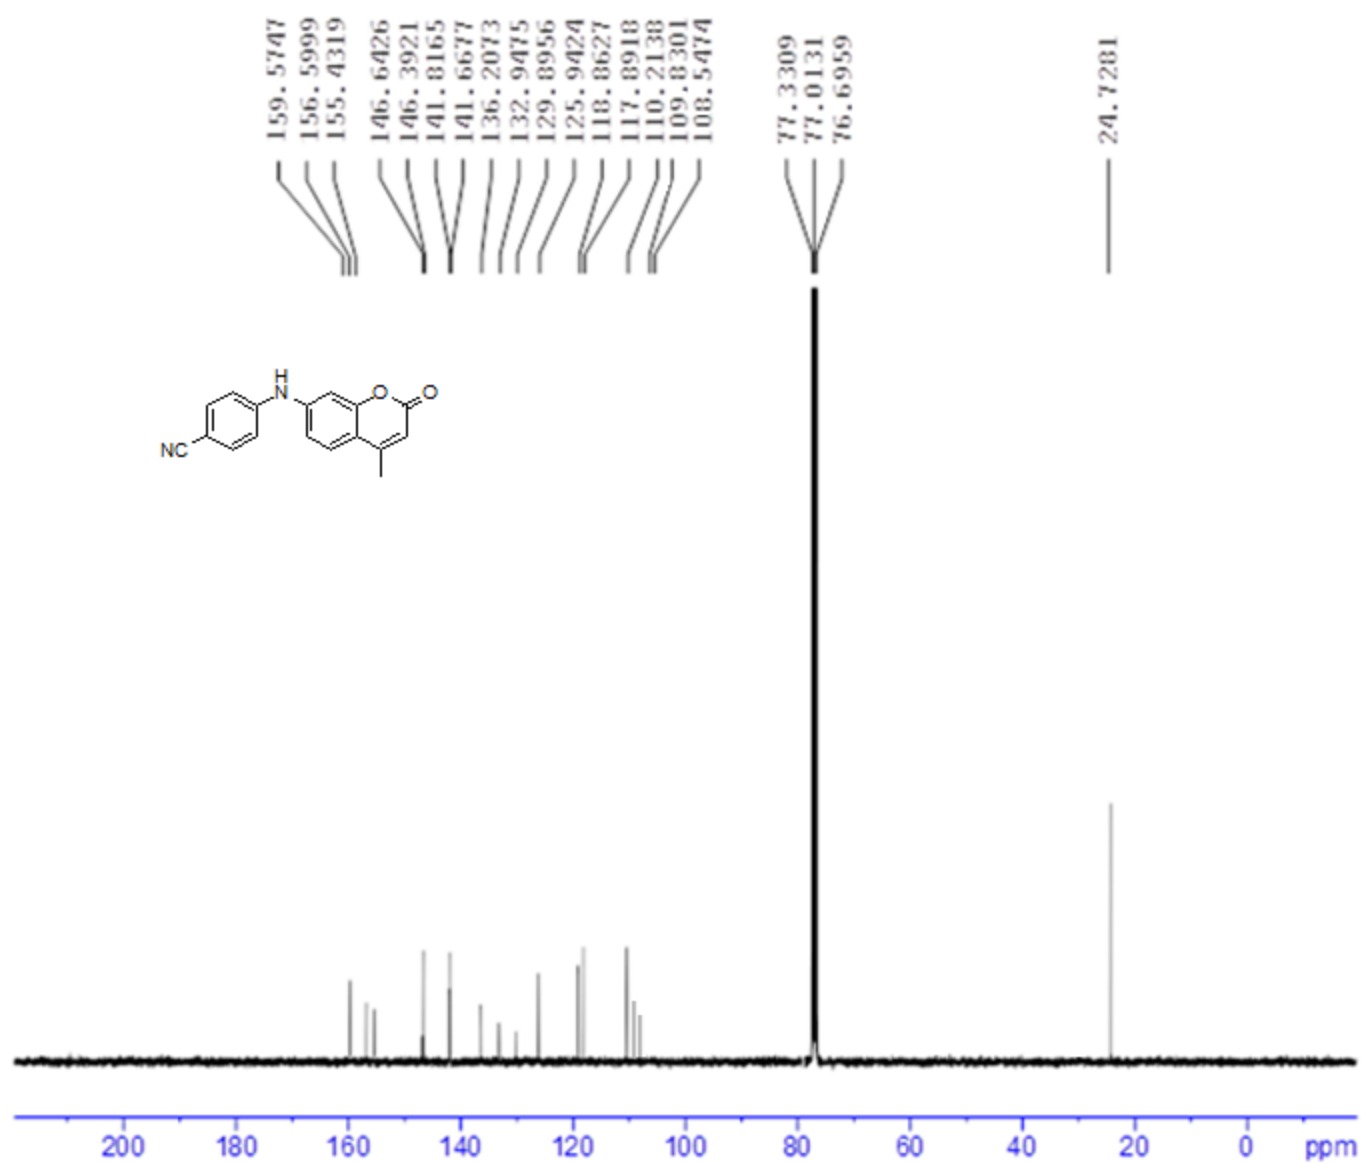

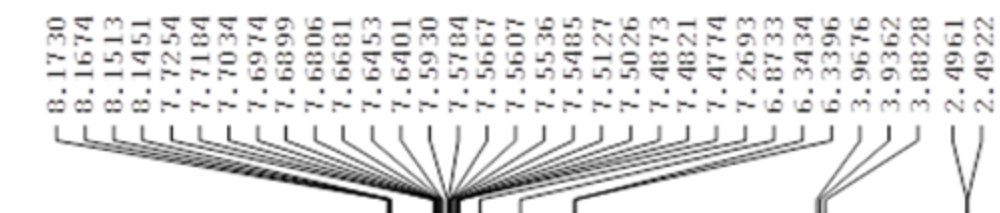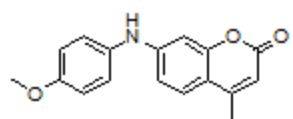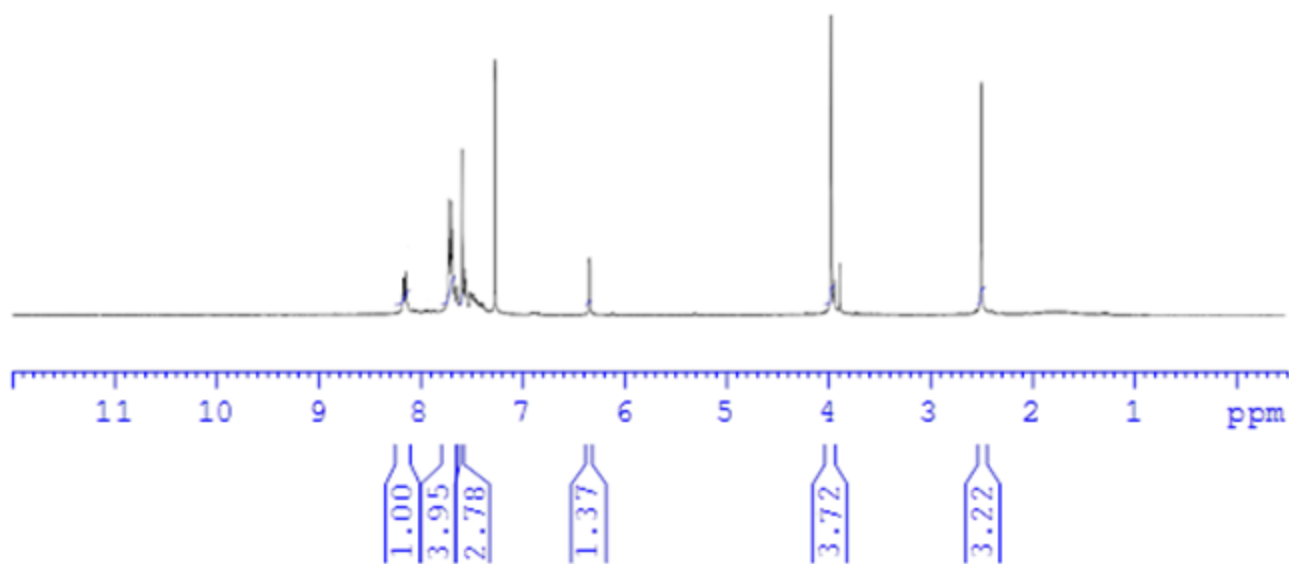

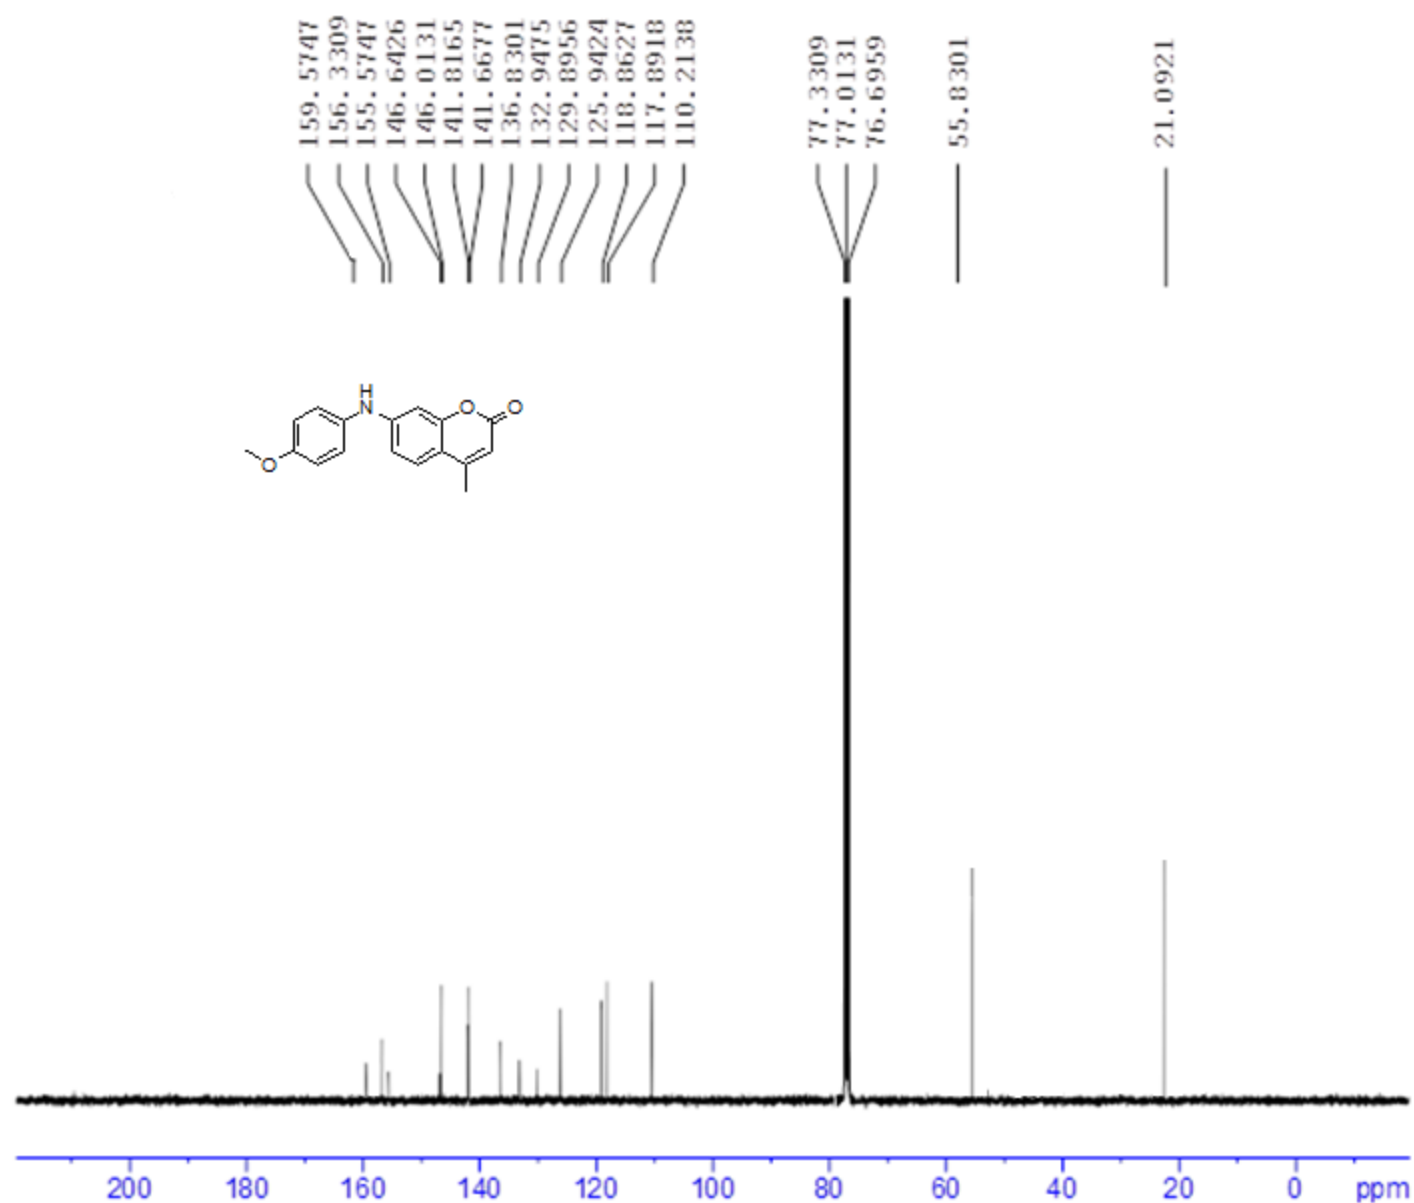

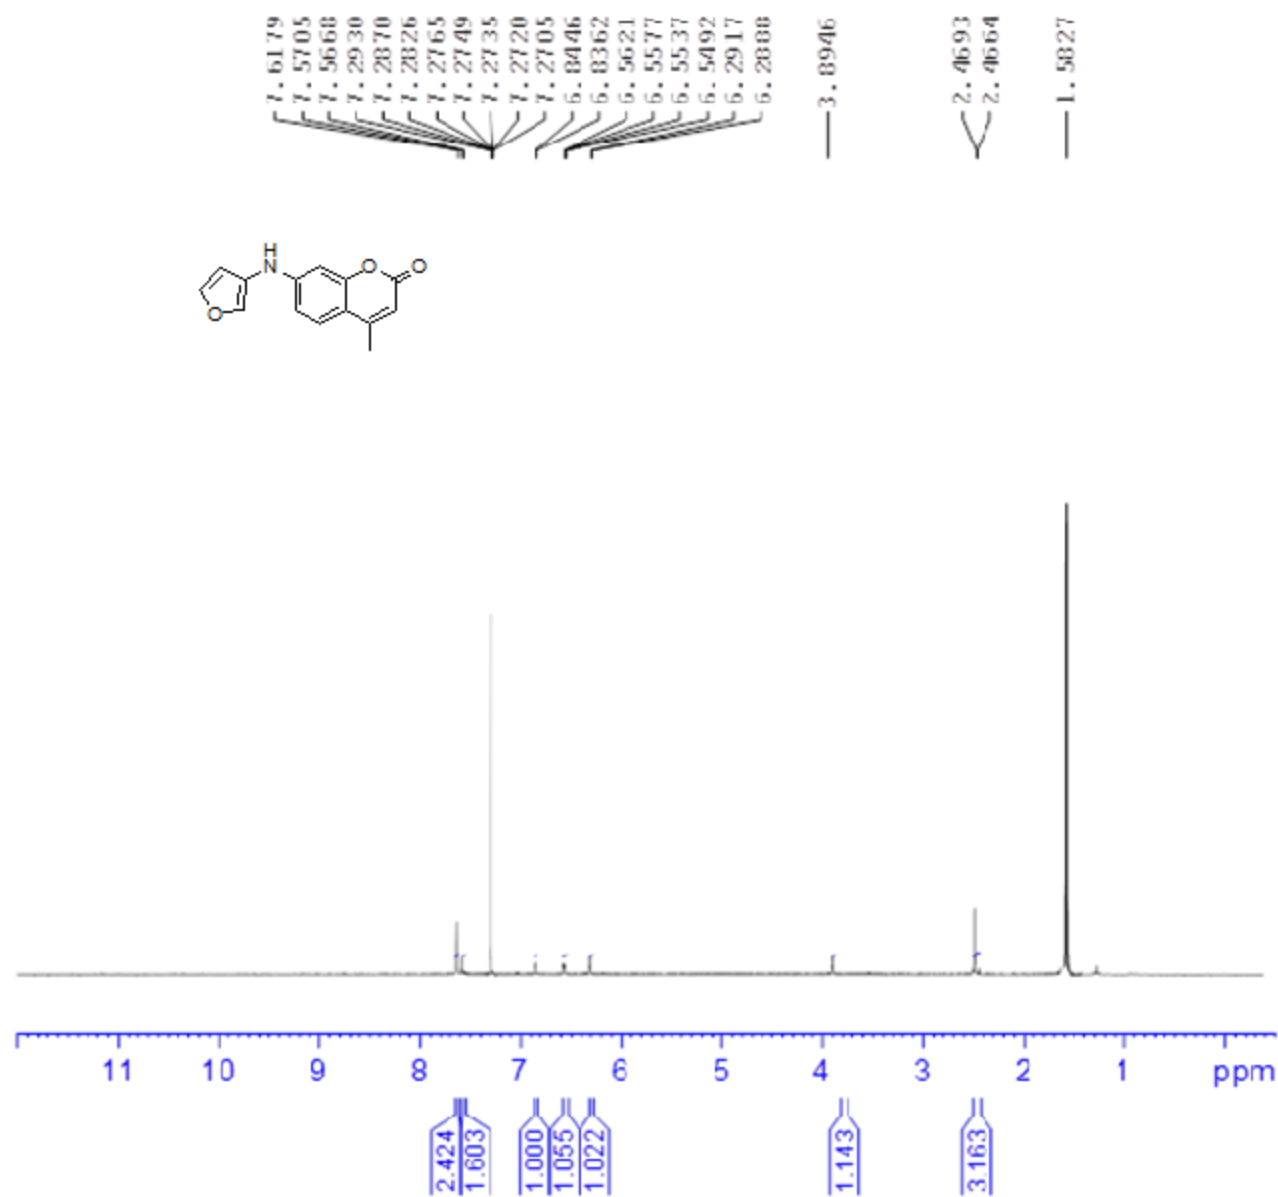

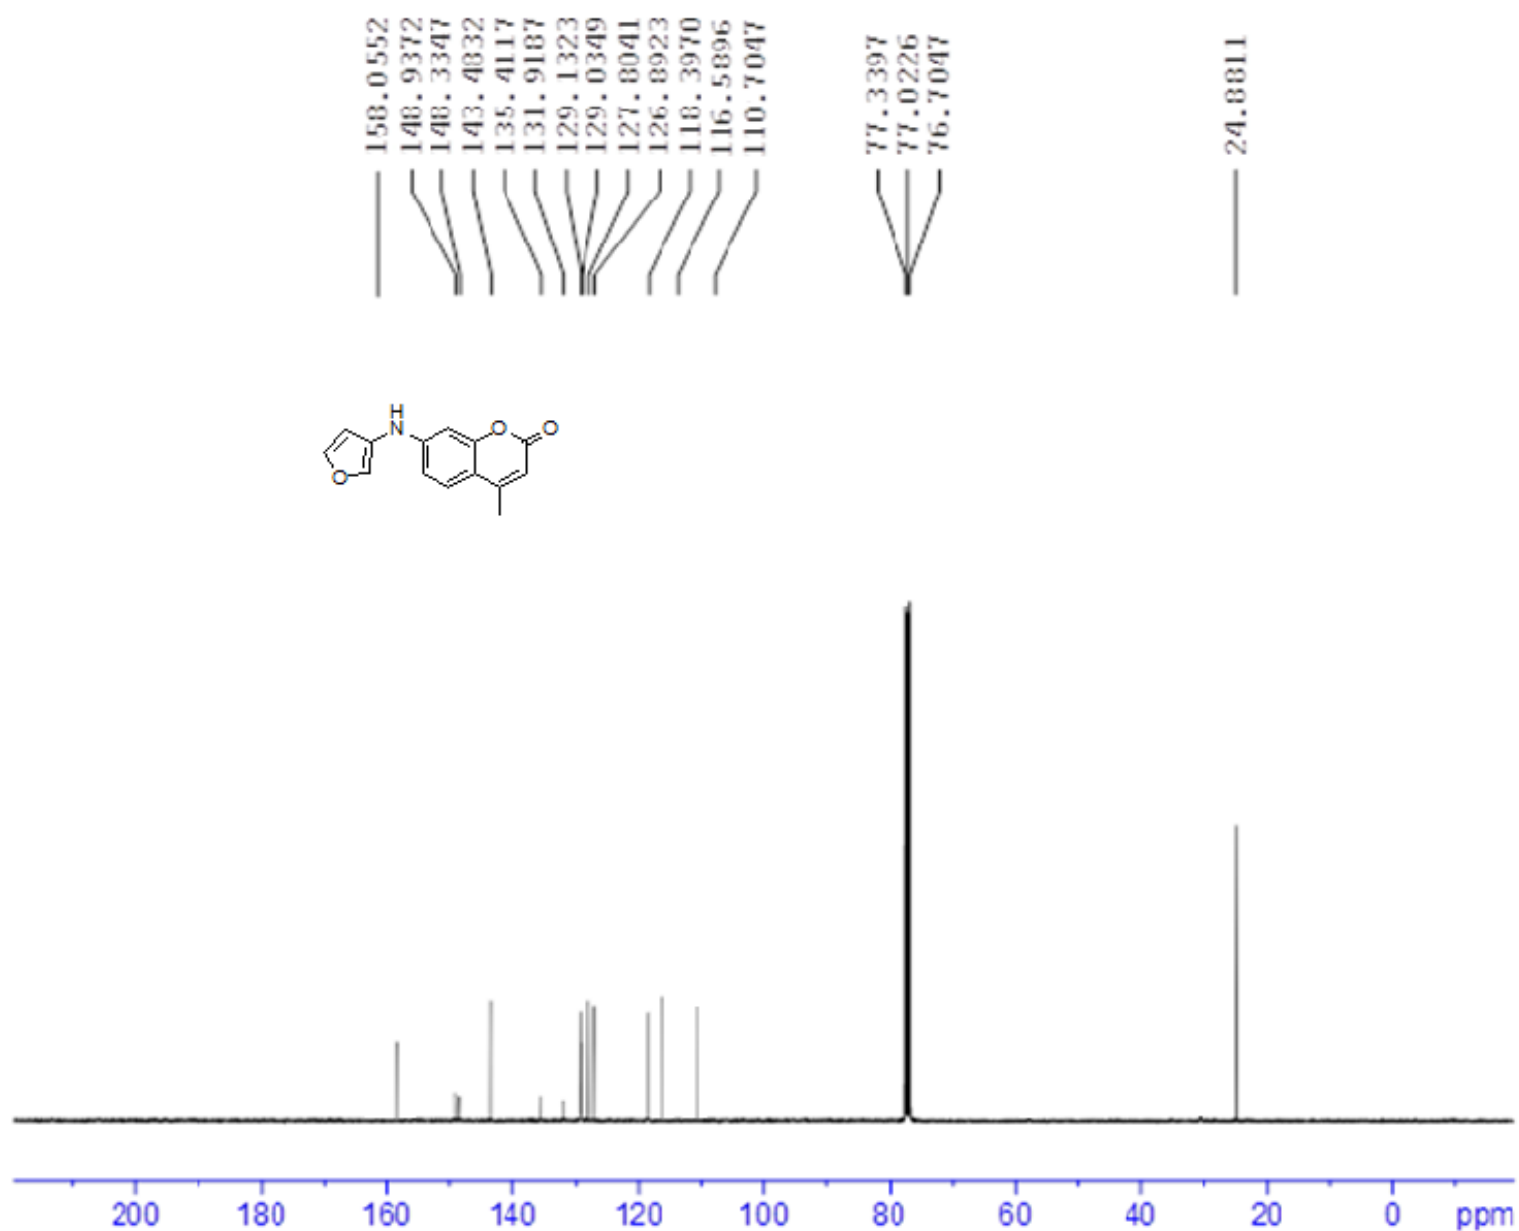



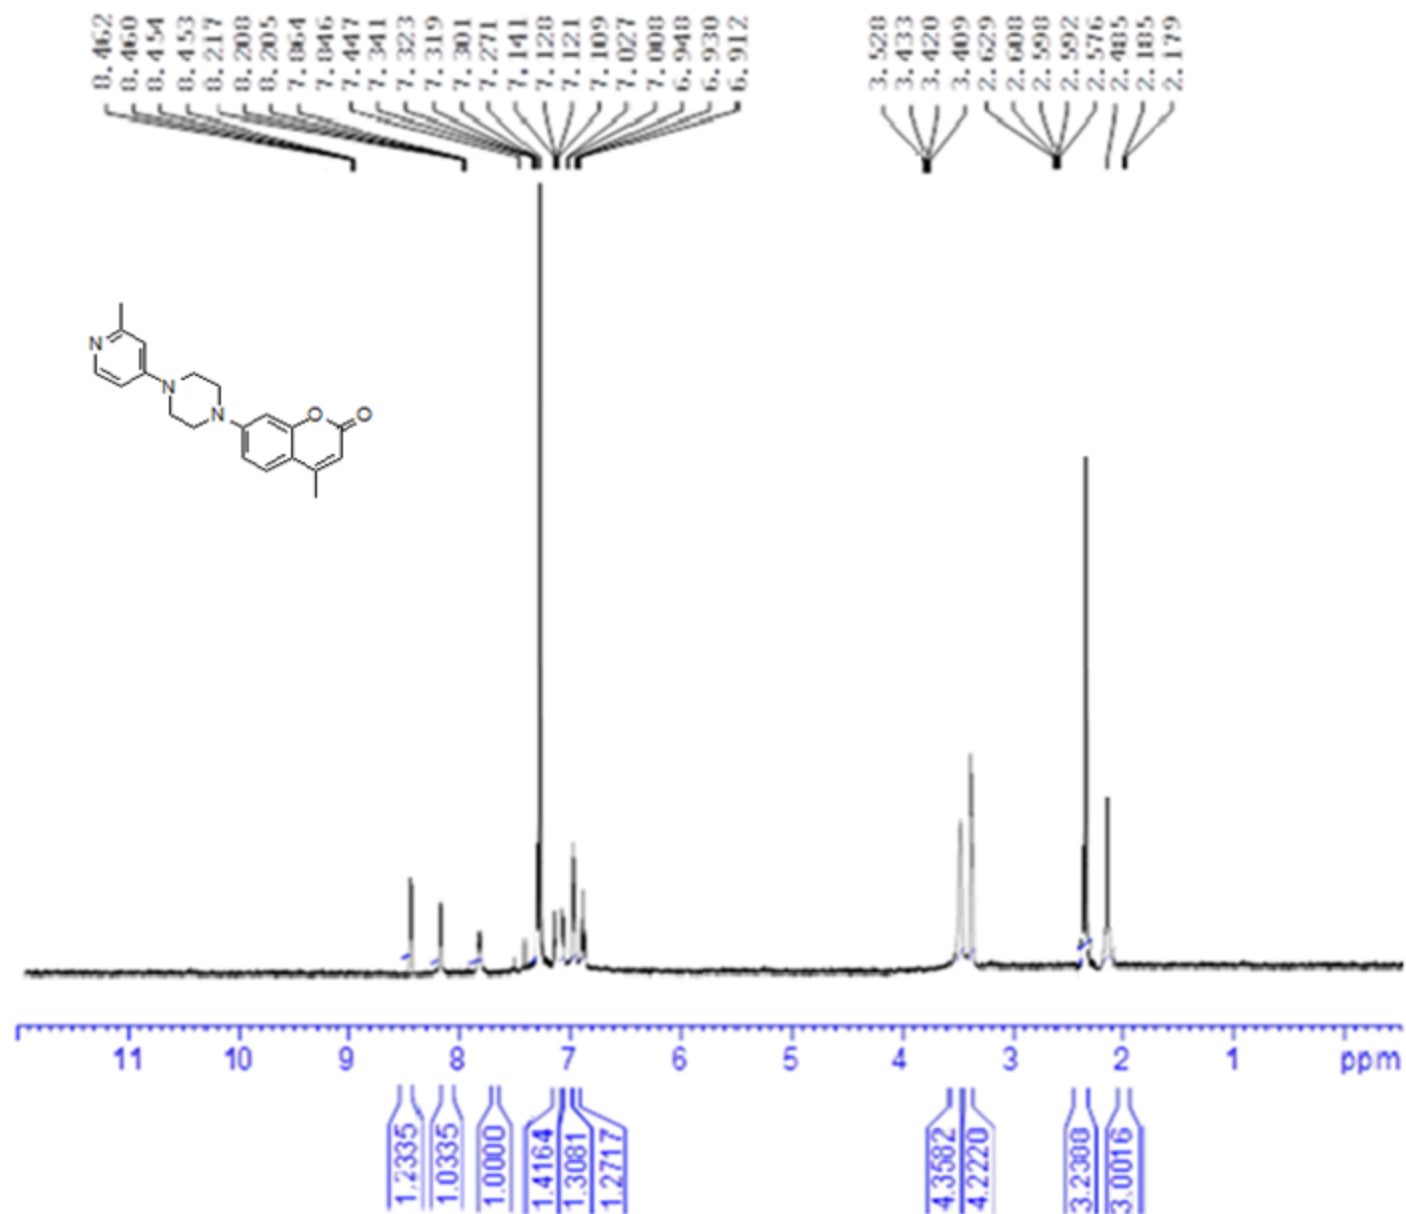

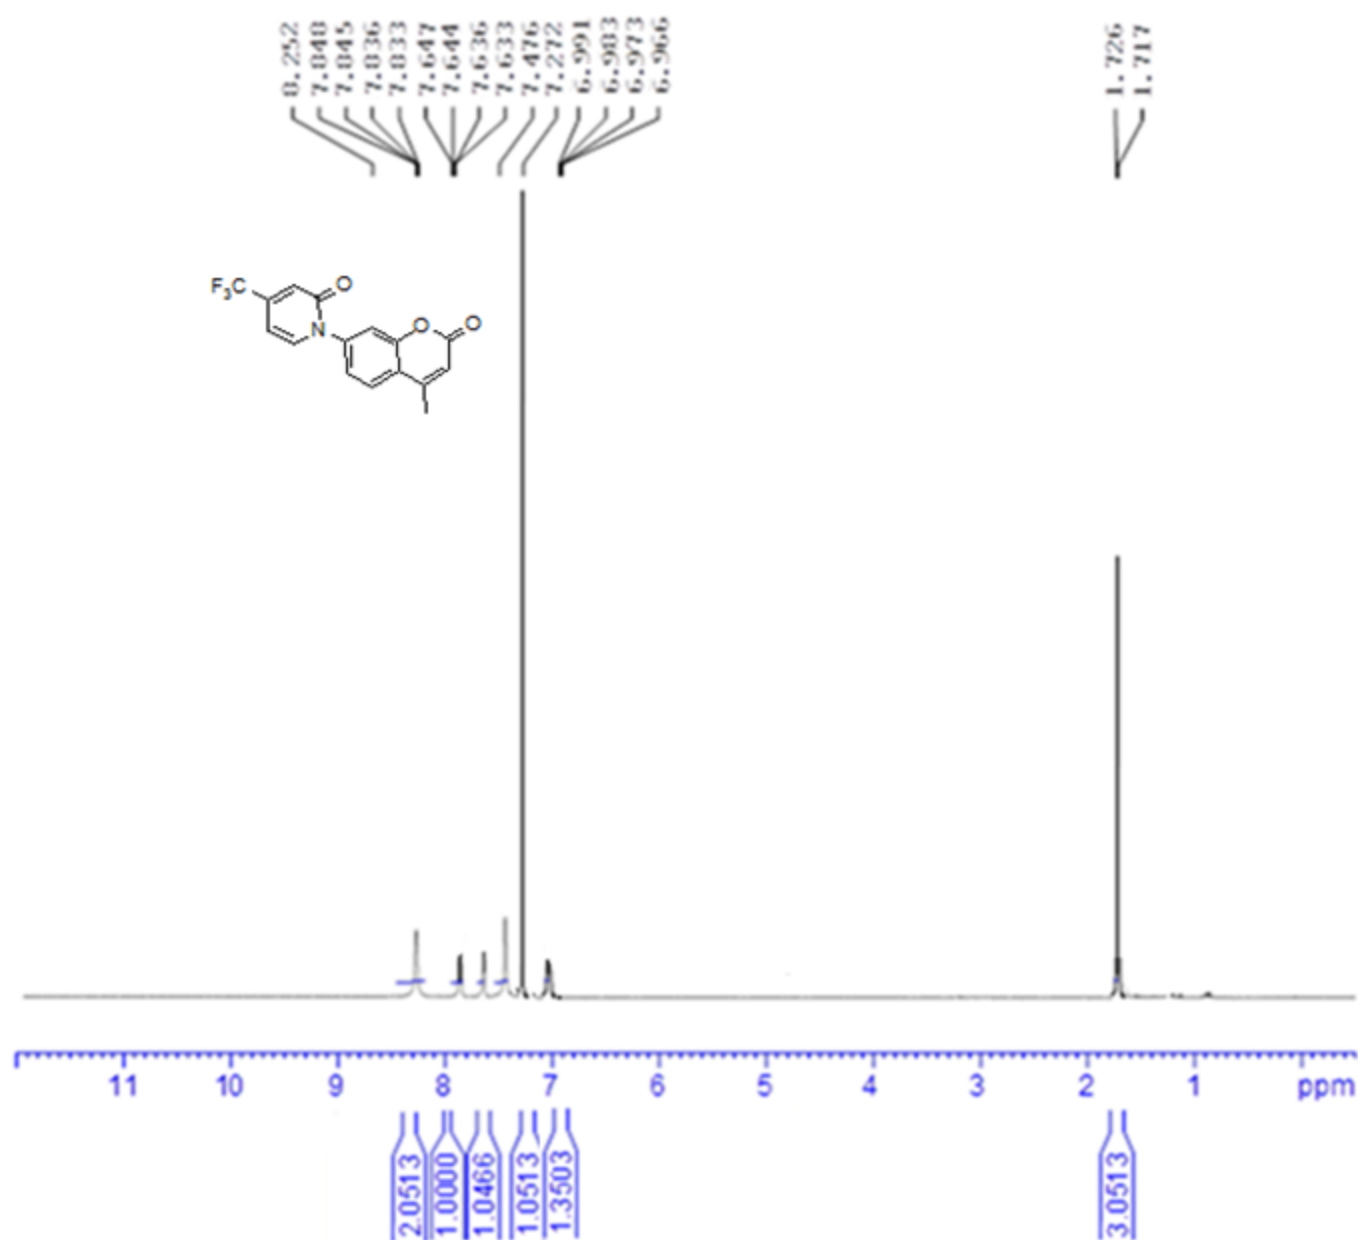

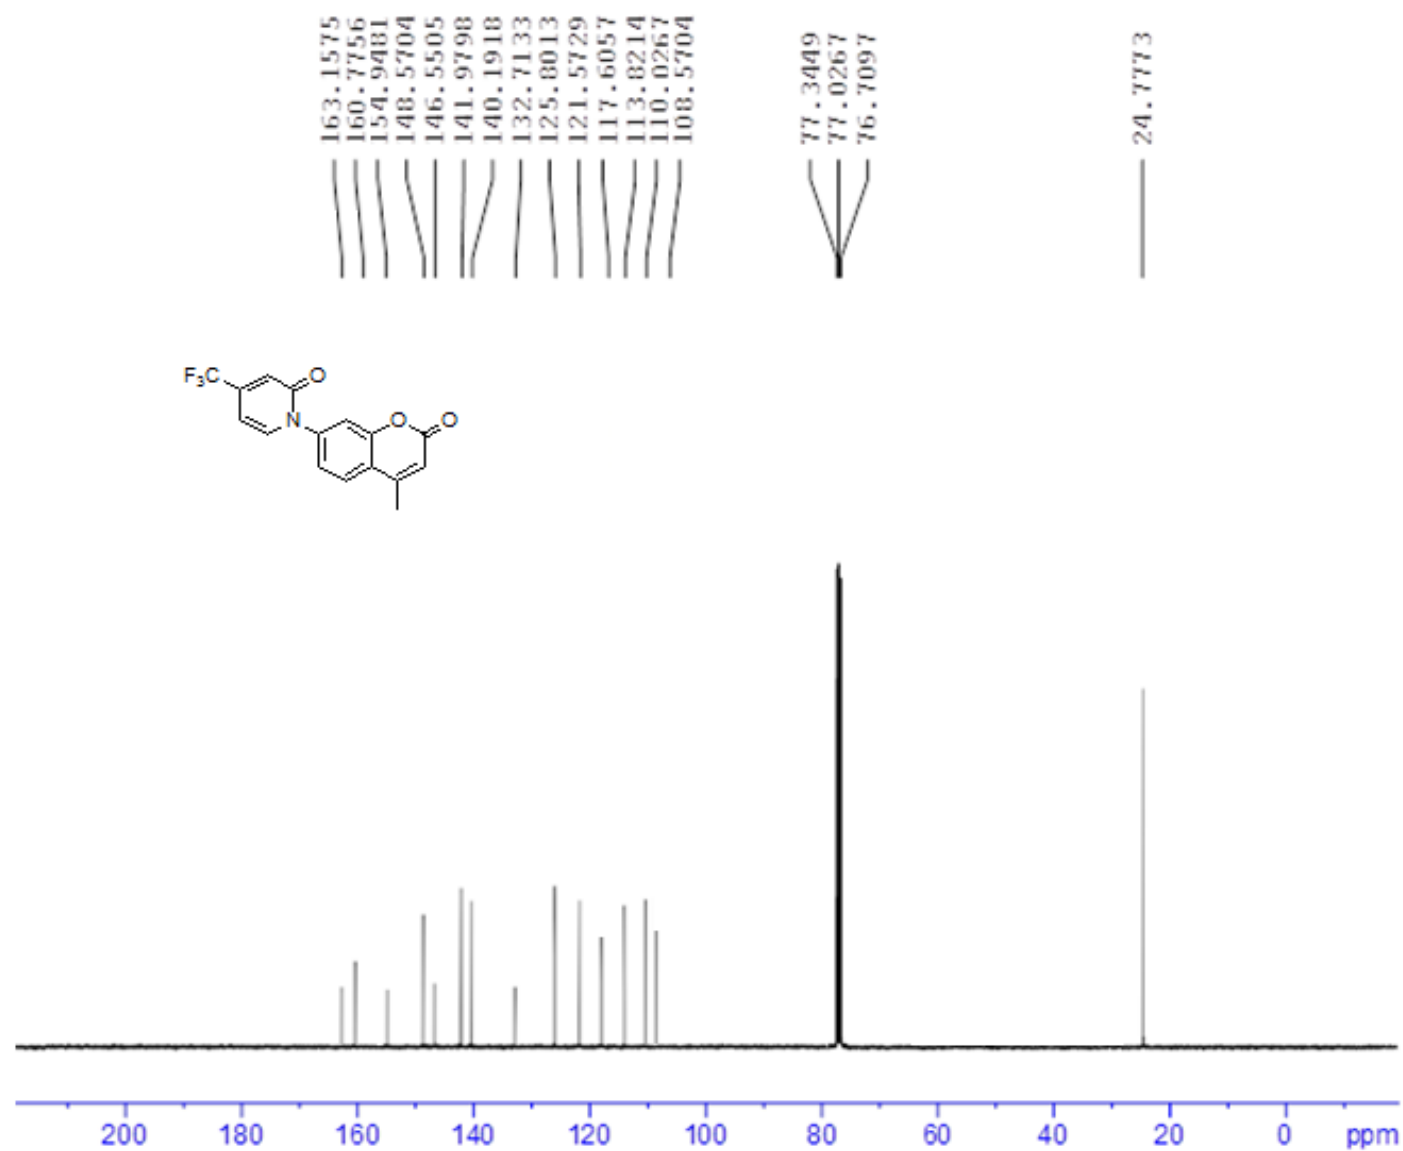

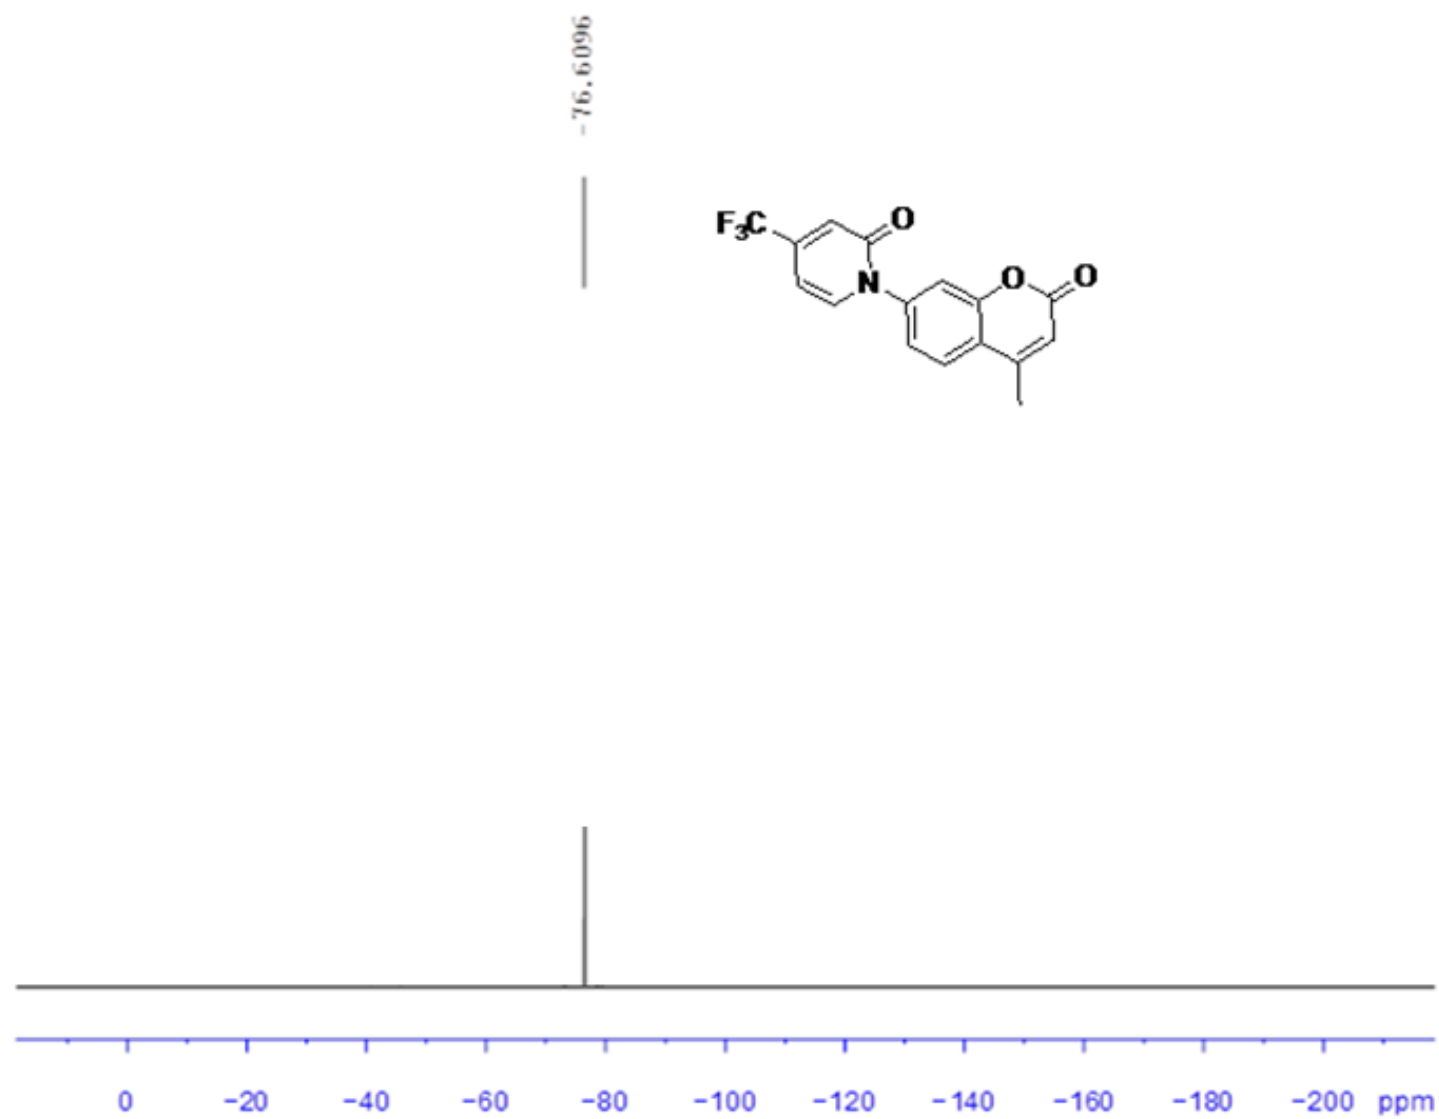



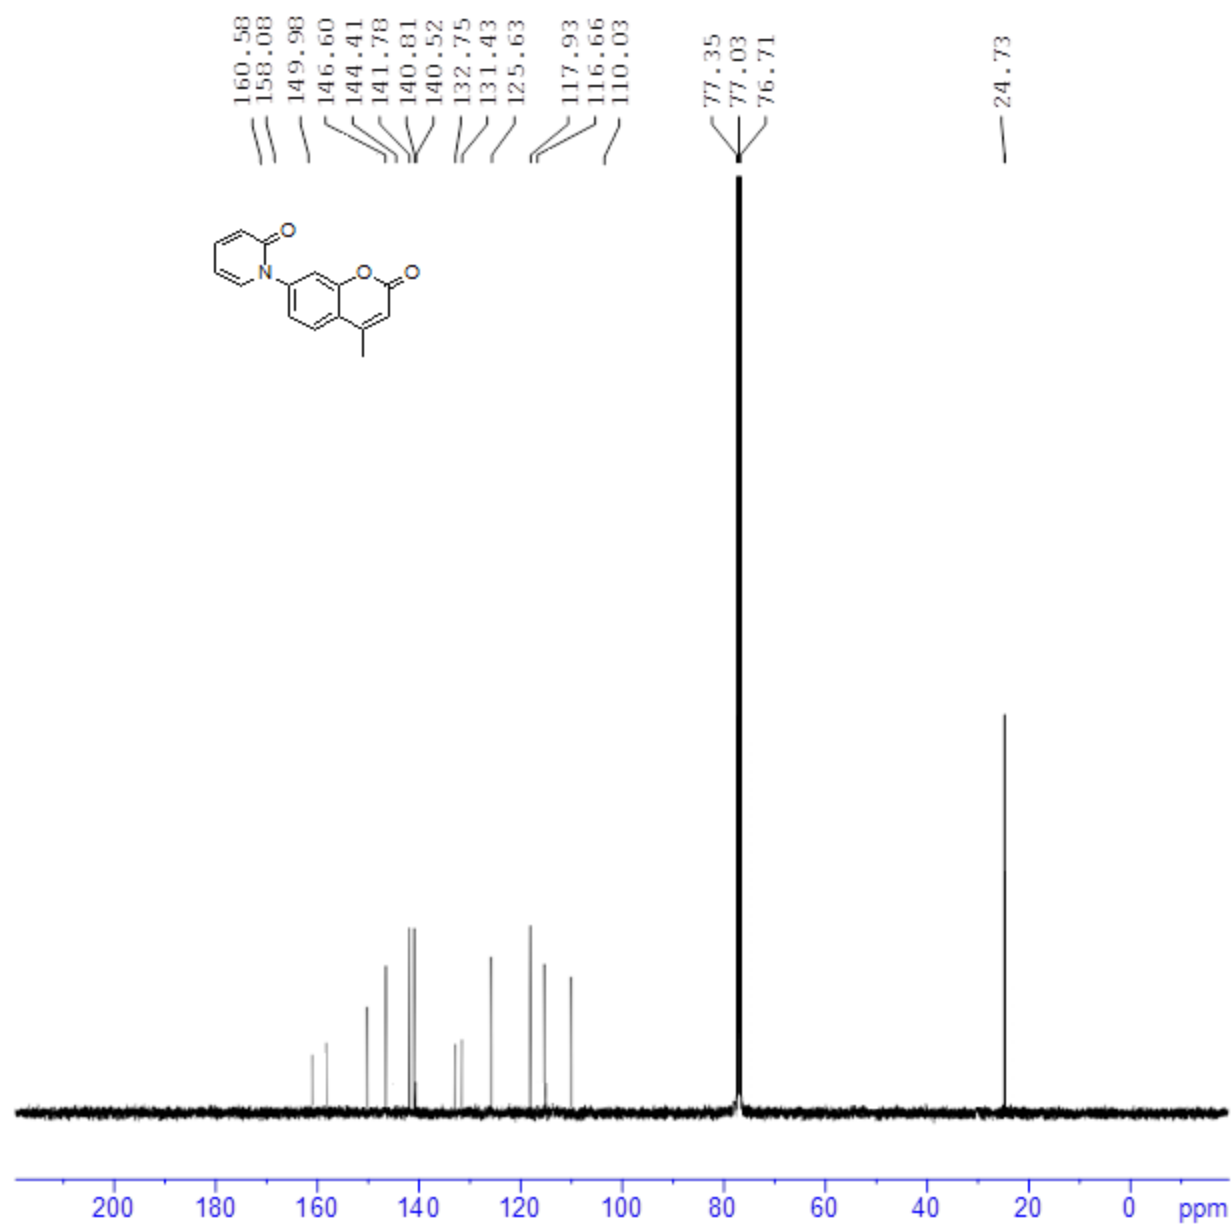

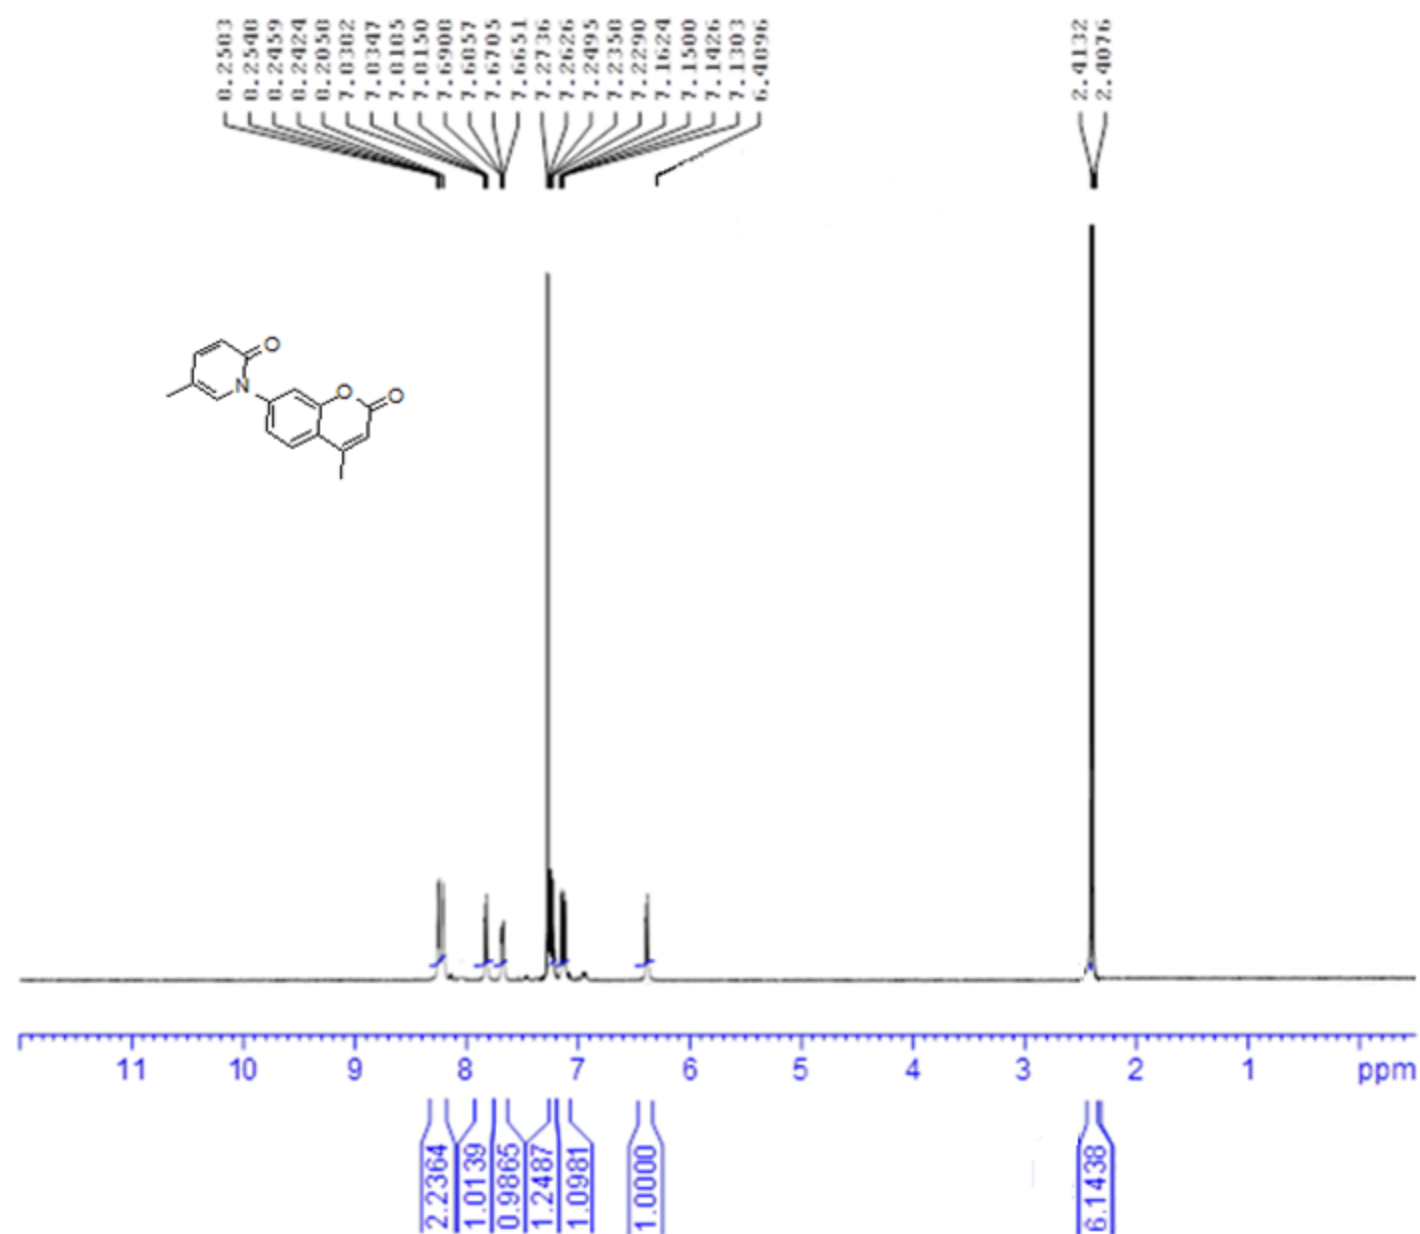

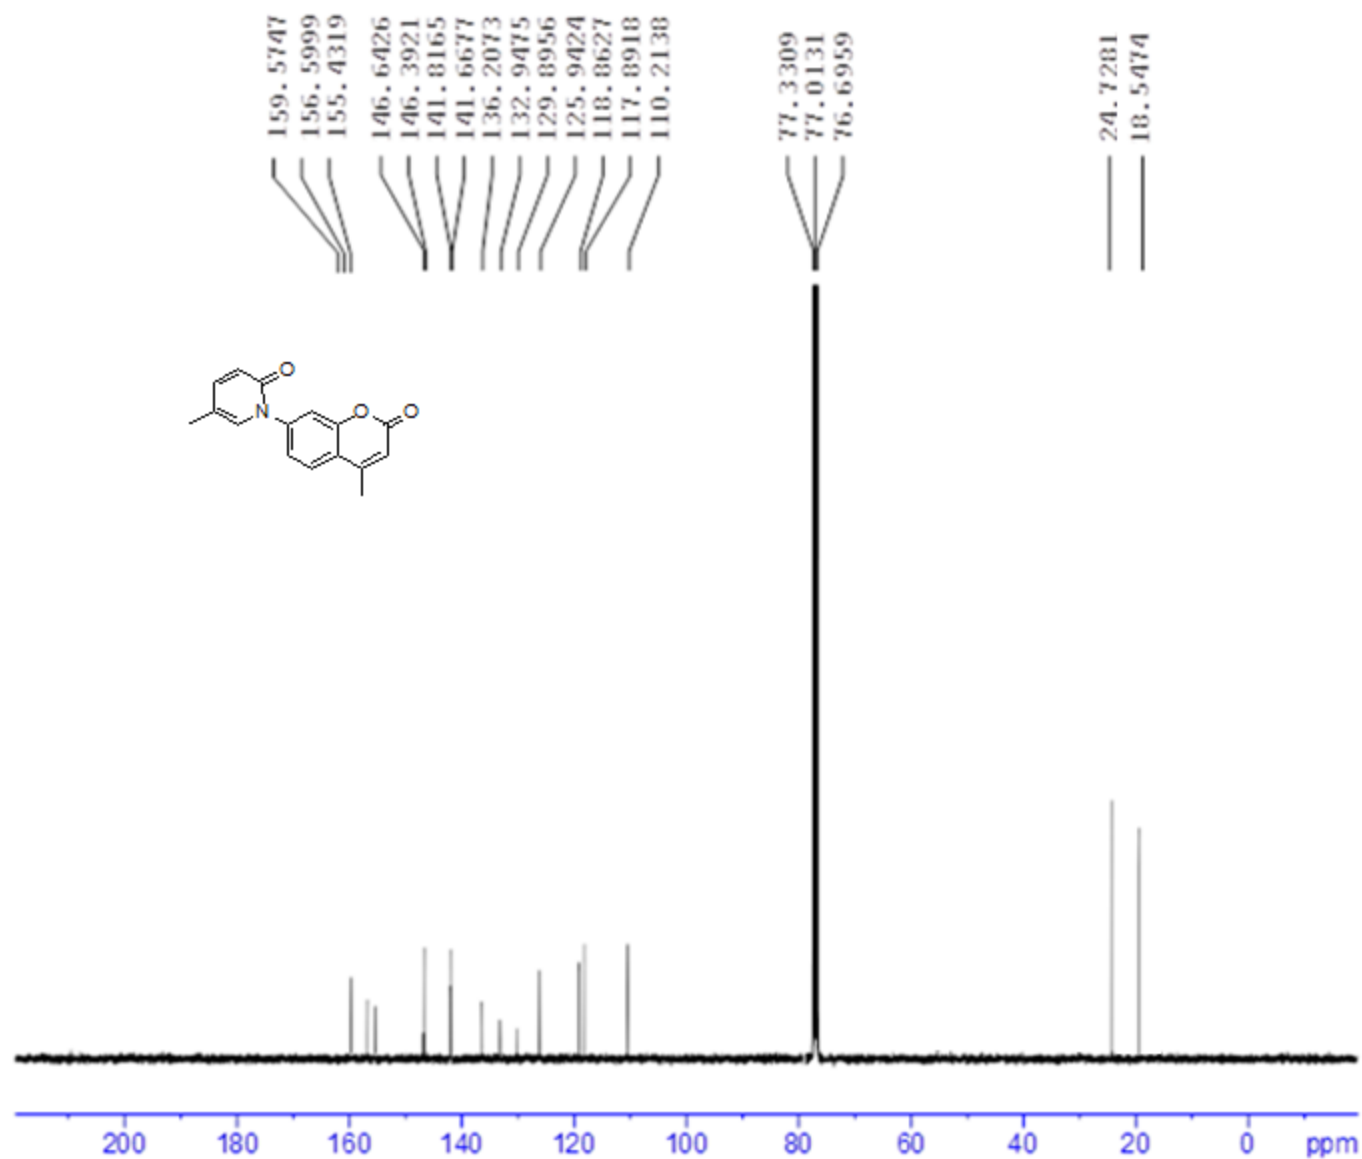



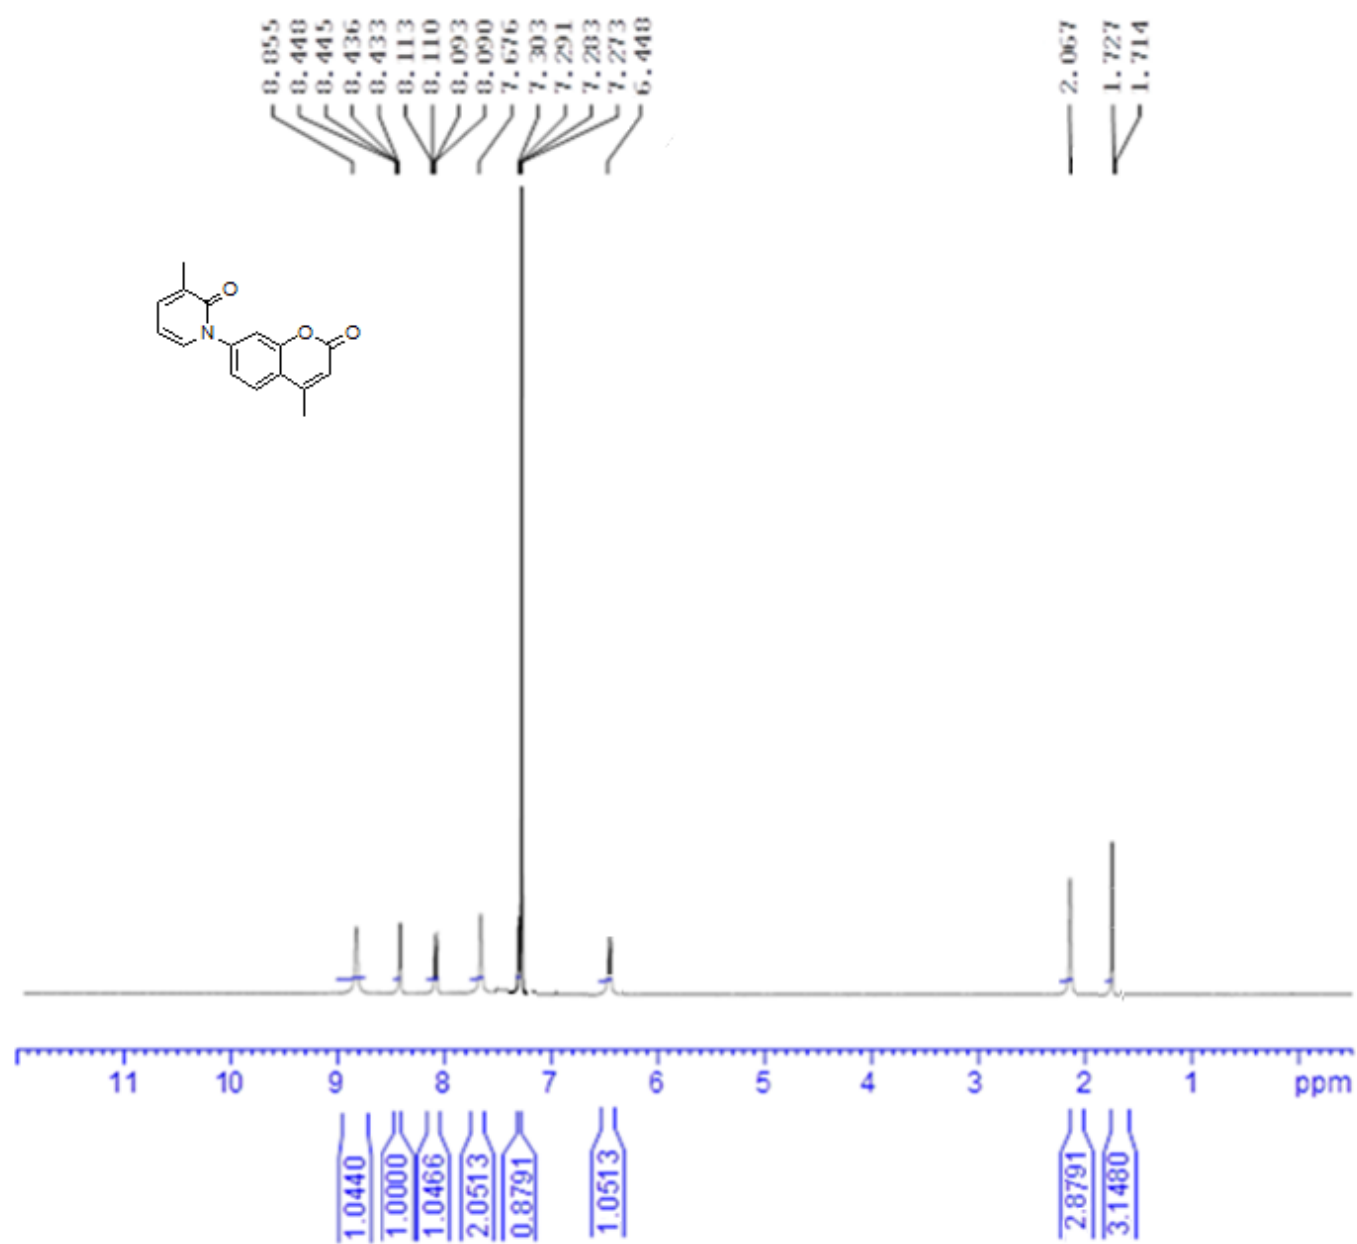

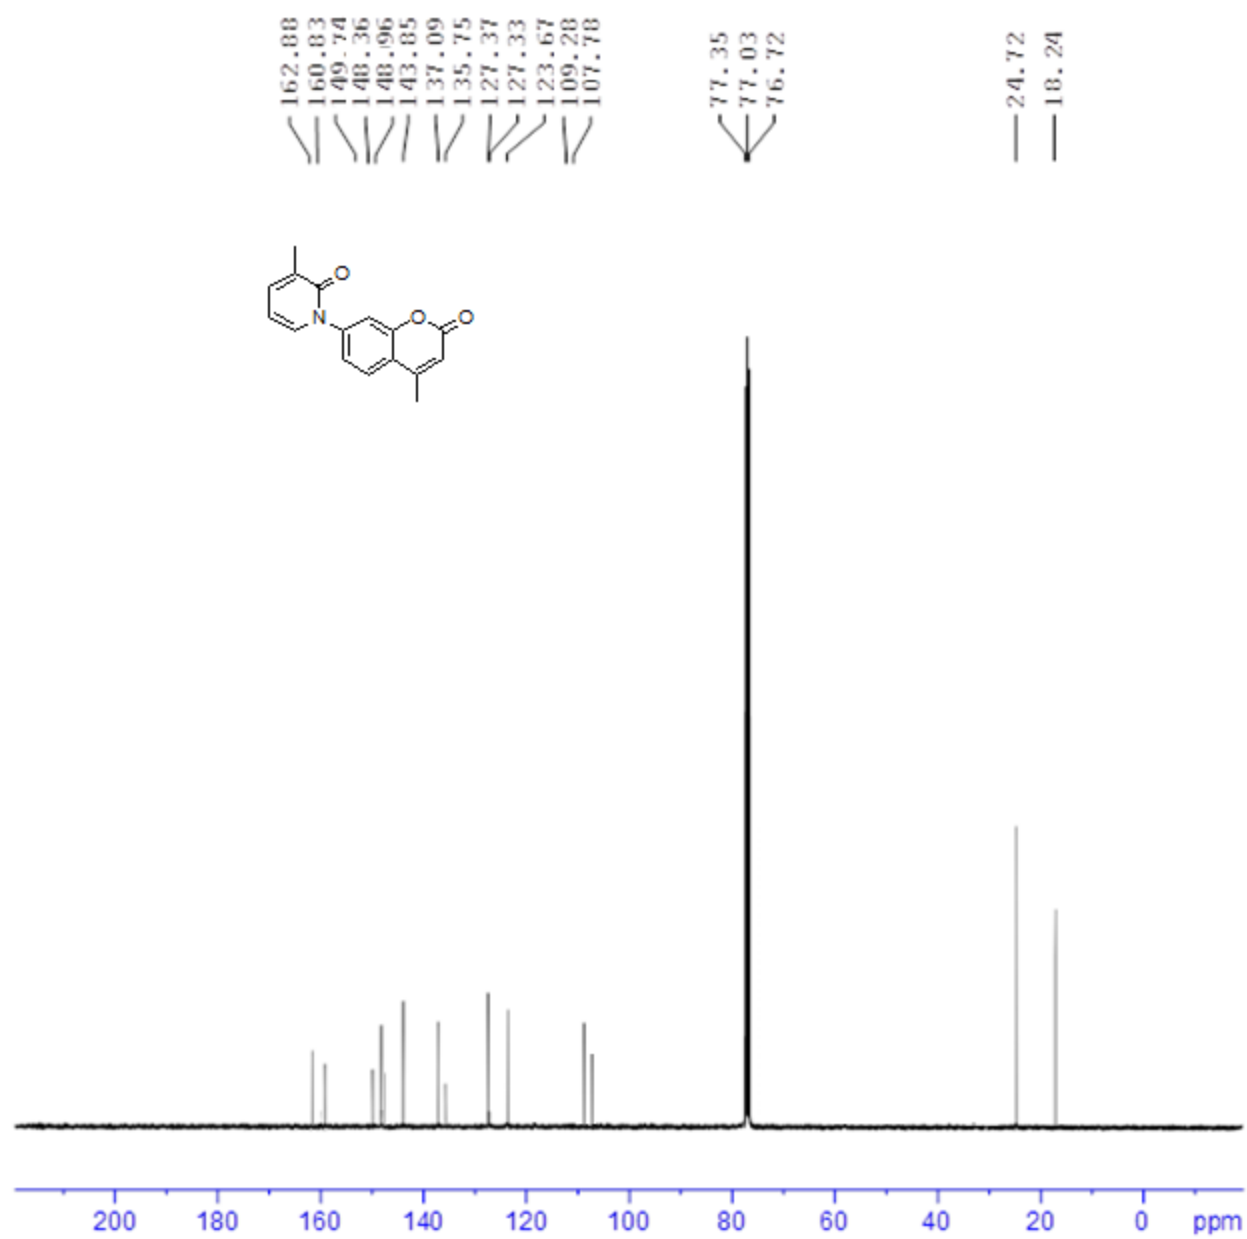

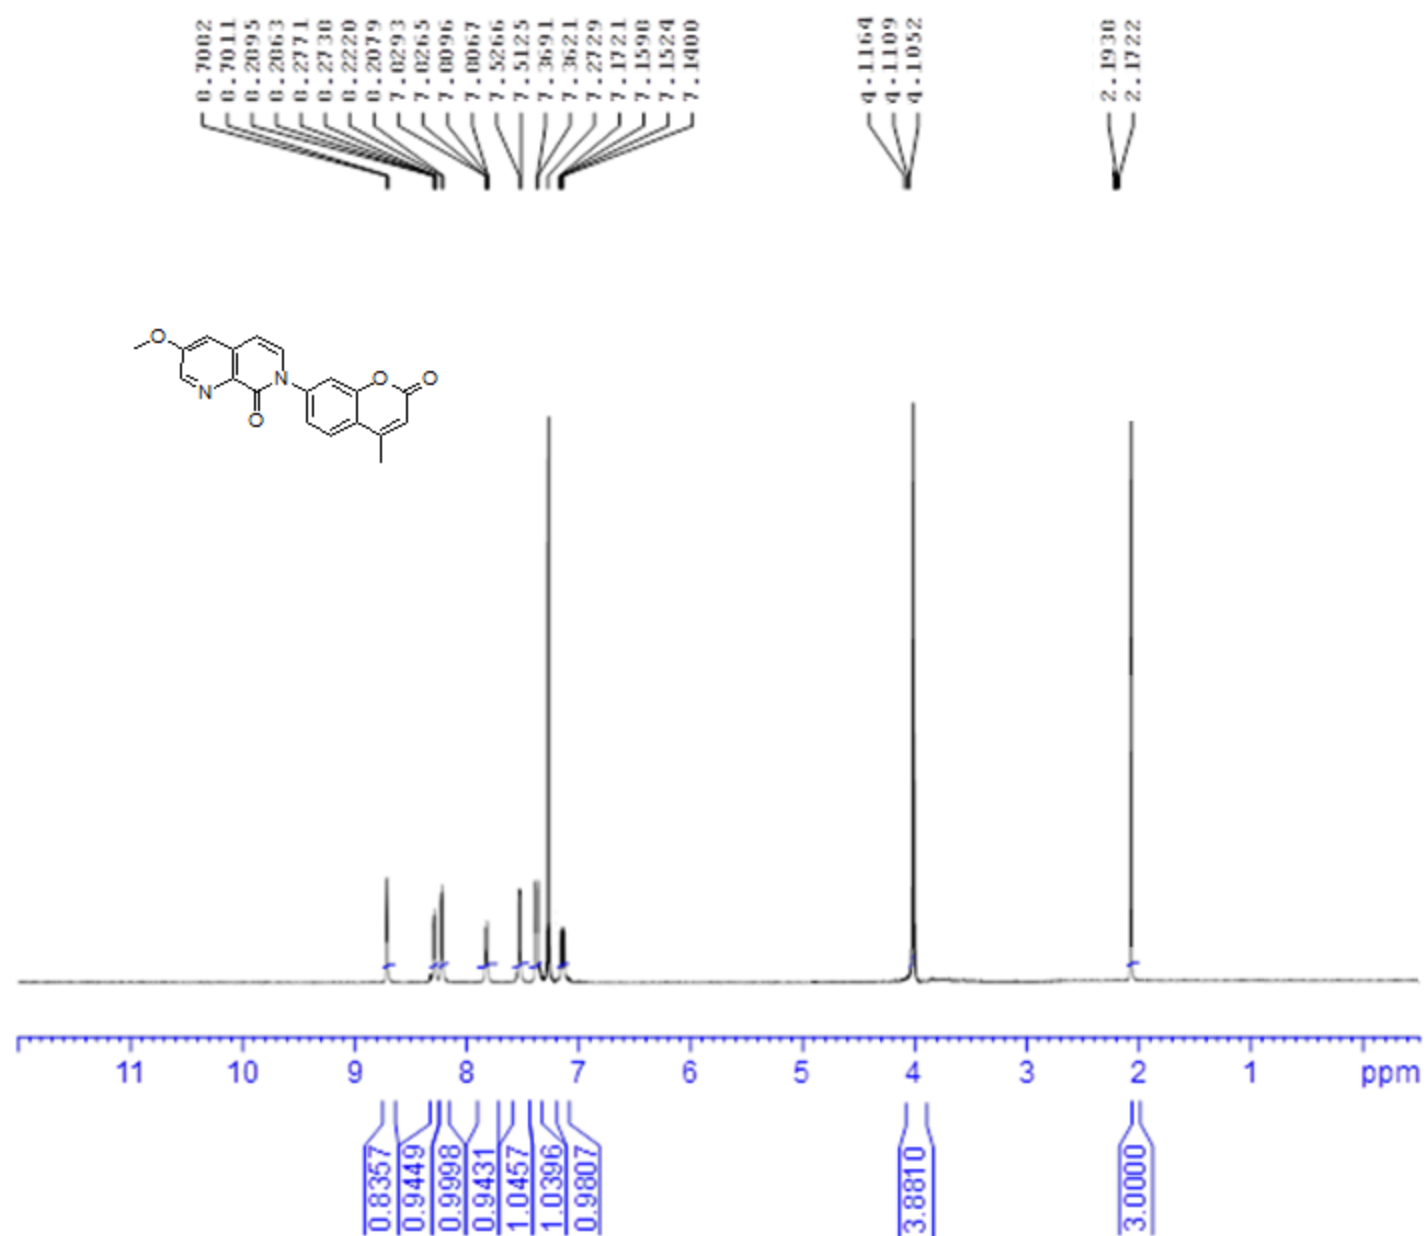

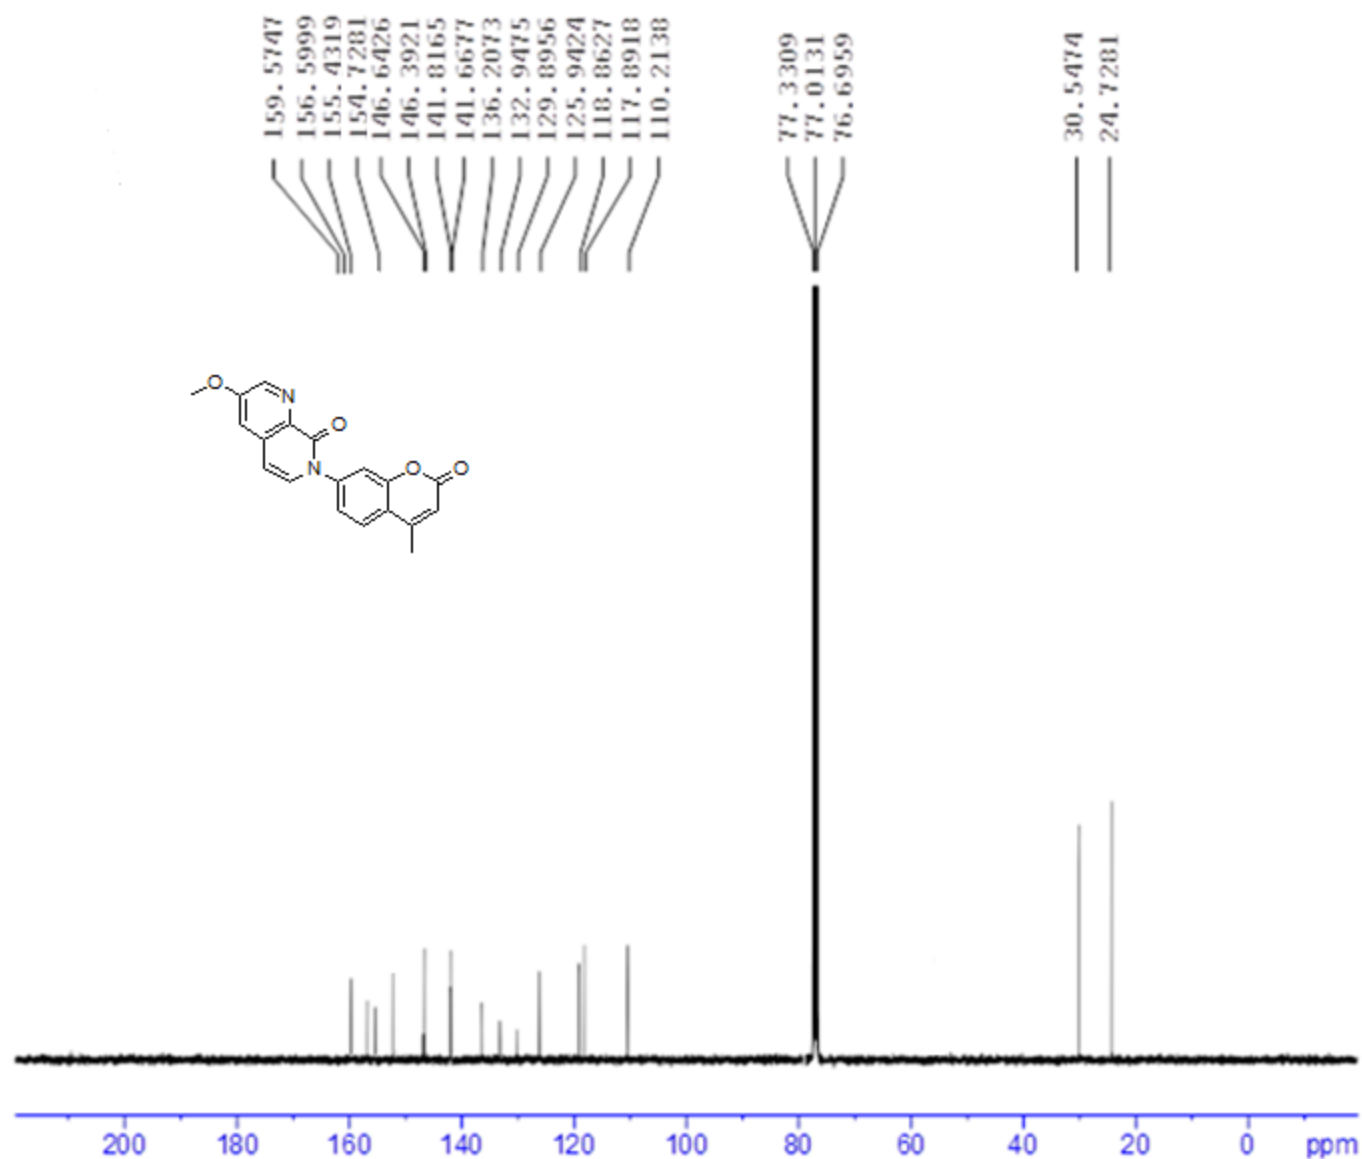

Supplement: c4ra01720j1.pdf [file c4ra01720j1.pdf]
